# Supplementary material for: Nuclear Proteomics Uncovers Diurnal Regulatory Landscapes in Mouse Liver
Source: PubMed Central journal article supplement — Cell Metab. 2017 Jan 10;25(1):102–17. doi: 10.1016/j.cmet.2016.10.003 (PMC5241201; doi:10.1016/j.cmet.2016.10.003), 2017-01-10
Supplement: mmc9.pdf [file mmc9.pdf]

# Cell Metabolism

## Nuclear Proteomics Uncovers Diurnal Regulatory Landscapes in Mouse Liver

### Graphical Abstract

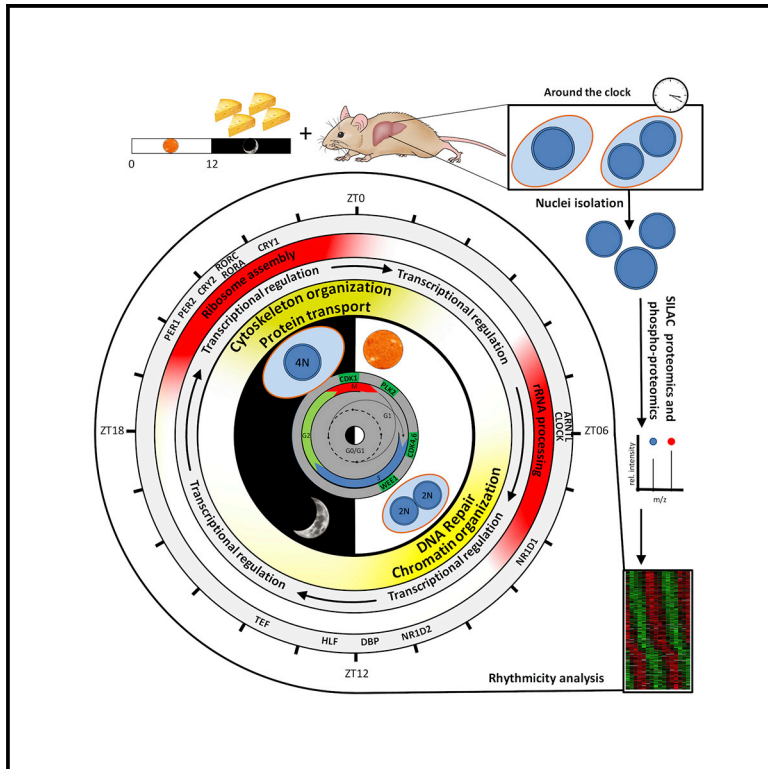

### Authors

Jingkui Wang, Daniel Mauvoisin, Eva Martin, ..., Vjekoslav Dulić, Felix Naef, Frédéric Gachon

### Correspondence

felix.naef@epfl.ch (F.N.), frederic.gachon@rd.nestle.com (F.G.)

### In Brief

Wang et al. quantify the temporal nuclear accumulation of proteins and phosphoproteins in the mouse liver and reveal that 13% of nuclear proteins exhibit a diurnal rhythm regulated at the post-translational level through nuclear transport of protein complexes involved in transcription, DNA repair, ribosome biogenesis, cell cycle, and polyploidy.

### Highlights

- SILAC nuclear proteomics uncovered new diurnal regulatory landscape of mouse liver
- Regulation of the diurnal nuclear proteome is mostly post-translational
- Diurnal proteins regulate transcription, ribosome biogenesis, DNA repair, and cell cycle
- Hepatocyte polyploidy and size oscillate diurnally

### Accession Numbers

PXD003818  
PXD004191

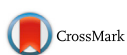

# Nuclear Proteomics Uncovers Diurnal Regulatory Landscapes in Mouse Liver

Jingkui Wang,<sup>1,9</sup> Daniel Mauvoisin,<sup>2,9,10</sup> Eva Martin,<sup>2</sup> Florian Atger,<sup>2,3</sup> Antonio Núñez Galindo,<sup>4</sup> Loïc Dayon,<sup>4</sup> Federico Sizzano,<sup>5</sup> Alessio Palini,<sup>5</sup> Martin Kussmann,<sup>4</sup> Patrice Waridel,<sup>6</sup> Manfredo Quadroni,<sup>6</sup> Vjekoslav Dulić,<sup>7</sup> Felix Naef,<sup>1,10,\*</sup> and Frédéric Gachon<sup>2,8,10,11,\*</sup>

<sup>1</sup>Institute of Bioengineering, School of Life Sciences, Ecole Polytechnique Fédérale de Lausanne, CH-1015 Lausanne, Switzerland

<sup>2</sup>Department of Diabetes and Circadian Rhythms, Nestlé Institute of Health Sciences, CH-1015 Lausanne, Switzerland

<sup>3</sup>Department of Pharmacology and Toxicology, University of Lausanne, CH-1015 Lausanne, Switzerland

<sup>4</sup>Systems Nutrition, Metabonomics, and Proteomics

<sup>5</sup>Department of Cell Biology

Nestlé Institute of Health Sciences, CH-1015 Lausanne, Switzerland

<sup>6</sup>Protein Analysis Facility, University of Lausanne, CH-1015 Lausanne, Switzerland

<sup>7</sup>CNRS, UMR 5535, Institut de Génétique Moléculaire de Montpellier, 34090 Montpellier, France

<sup>8</sup>School of Life Sciences, Ecole Polytechnique Fédérale de Lausanne, CH-1015 Lausanne, Switzerland

<sup>9</sup>Co-first author

<sup>10</sup>Present address: Institute of Bioengineering, School of Life Sciences, Ecole Polytechnique Fédérale de Lausanne, CH-1015 Lausanne, Switzerland

<sup>11</sup>Lead Contact

\*Correspondence: [felix.naef@epfl.ch](mailto:felix.naef@epfl.ch) (F.N.), [frederic.gachon@rd.nestle.com](mailto:frederic.gachon@rd.nestle.com) (F.G.)

<http://dx.doi.org/10.1016/j.cmet.2016.10.003>

## SUMMARY

Diurnal oscillations of gene expression controlled by the circadian clock and its connected feeding rhythm enable organisms to coordinate their physiologies with daily environmental cycles. While available techniques yielded crucial insights into regulation at the transcriptional level, much less is known about temporally controlled functions within the nucleus and their regulation at the protein level. Here, we quantified the temporal nuclear accumulation of proteins and phosphoproteins from mouse liver by SILAC proteomics. We identified around 5,000 nuclear proteins, over 500 of which showed a diurnal accumulation. Parallel analysis of the nuclear phosphoproteome enabled the inference of the temporal activity of kinases accounting for rhythmic phosphorylation. Many identified rhythmic proteins were parts of nuclear complexes involved in transcriptional regulation, ribosome biogenesis, DNA repair, and the cell cycle and its potentially associated diurnal rhythm of hepatocyte polyploidy. Taken together, these findings provide unprecedented insights into the diurnal regulatory landscape of the mouse liver nucleus.

## INTRODUCTION

While the human and mouse genomes have been available for over a decade, progress in measuring the expression of gene products has been made mainly on the level of mRNA abundance (Melé et al., 2015) and, to a lesser extent, proteins (Geiger et al.,

2013; Kim et al., 2014), with little information on their cellular localization and dynamic regulation. Indeed, cellular functions in eukaryotes often rely on membrane-enclosed organelles with specialized and compartmentalized functions, interacting dynamically with each other. The cell nucleus can sense signals from biochemical or mechanical origins and translate these into molecular response, notably through control of gene expression. Proteomic studies have therefore characterized the protein composition of different nuclear compartments, notably the nuclear membrane (Schirmer et al., 2003), the nuclear pore (Cronshaw et al., 2002), the nucleolus (Andersen et al., 2005), the centrosome (Andersen et al., 2003), or interchromatin granules (Saitoh et al., 2004). However, apart from analyses of the brain and neurons (Dammer et al., 2013; Ren et al., 2015), heart (Franklin et al., 2011), liver (Zhang et al., 2013), or multiple tissues in parallel (Foster et al., 2006; Kislinger et al., 2006), only very few comprehensive total nuclear proteomes are available in mammalian cells and tissues. In all these cases, the obtained coverage was still fairly low compared to the predicted mammalian nuclear proteome (Bauer et al., 2011; Fink et al., 2008). Moreover, quantitative proteomics techniques such as SILAC (stable isotope labeling with amino acids in culture) have rarely been employed, and no studies addressed dynamic aspects or genotype dependency of nuclear proteomes. In addition, while the whole-liver phosphoproteome has been previously described at a very high coverage (Humphrey et al., 2015), or as part of multiple tissue experiments (Huttlin et al., 2010; Lundby et al., 2012), no specific nuclear phosphoproteome has been analyzed experimentally on mammalian healthy tissue, though organelle-specific phosphoproteomes have been predicted computationally based on whole-cell studies (Chen et al., 2015).

Here, we focus on nuclear functions measured temporally in the mouse liver, as animals are exposed to diurnal and feeding-fasting cycles. In those conditions, the liver is spectacularly dynamic, changing not only its entire gene expression landscape

(Doherty and Kay, 2010), but also its morphology in response to feeding and hormonal cues (Gerber et al., 2013; Uchiyama and Asari, 1984). These changes are thought to allow the separation of incompatible metabolic processes occurring at different times of the day (Gachon et al., 2004), and are regulated through transcriptional, post-transcriptional, translational, and post-translational regulations (Asher and Sassone-Corsi, 2015). The circadian clock consists of an endogenous and autonomous oscillator with a period of nearly 24 hr, which coordinates most aspects of physiology and behavior in mammals, including humans (Gerhart-Hines and Lazar, 2015). This oscillatory clockwork is organized hierarchically, with a master clock in the suprachiasmatic nuclei of the hypothalamus that communicates timing signals to enslave oscillators in peripheral organs. Rhythms in gene products are generated by molecular feedback loops, in which multiple layers of control, including temporal post-transcriptional and post-translational regulation, contribute (Crane and Young, 2014). While transcriptional regulation orchestrated by the circadian clock has been well studied (Koike et al., 2012; Le Martelot et al., 2012; Vollmers et al., 2012), regulations at the proteome and phosphoproteome levels are largely unexplored, despite recent description of rhythmic protein levels in whole-tissue extracts (Mauvoisin et al., 2014; Robles et al., 2014).

Here, we report a quantitative and high-resolution analysis of the diurnal nuclear proteome and phosphoproteome in mouse liver, highlighting the deep impact of diurnal rhythms on liver function. In addition to transcriptional regulation, we found that crucial cellular functions like DNA repair, ribosome biogenesis, cell cycle, and polyploidy are also subject to diurnal regulation, mostly at the post-translational level. In this context, organelle-specific time-resolved quantitative proteomics provides an outstanding tool to systemically reveal regulated cellular functions, which would be inaccessible with genomic or whole-cell proteomic approaches.

## RESULTS

### High-Coverage Nuclear Proteome Quantified by SILAC-Based Mass Spectrometry in Mouse Liver

To measure the diurnal accumulation of proteins in the nucleus of mouse liver, we designed a quantitative SILAC mass spectrometry (MS) experiment in which nuclear protein extracts were harvested from mice liver every 3 hr for 2 days, yielding two biological replicates at each of eight time points. Relative protein abundance in those 16 samples was quantified against a common reference sample obtained by *in vivo* total stable isotope labeling of mouse tissues (SILAC) as described before (Figure S1A, available online; related to Figure 1) (Mauvoisin et al., 2014). This SILAC-based analysis identified a total of 4,820 distinct proteins, of which 84% (4,035) yielded relative measurements in at least 8 out of the 16 samples (Figure S1B; Table S1; related to Figure 1). We globally obtained a high correlation between biological replicates (70% correlation on average), with the exception of zeitgeber time (ZT; ZT0, lights on; ZT12, lights off) 21 due to a potential contamination of one sample during the nuclei preparation (Figure S1C). Among the detected proteins with known subcellular localization in Uniprot (UniProt Consortium, 2015), around 75% were known to localize in the nucleus or to shuttle between the nucleus and cytoplasm. Moreover, 93% of the ob-

tained MS raw signal was from nuclear/shuttling proteins (Figures S1D and S1E), and more than 80% of all identified proteins were nuclear according to the COMPARTMENTS database (Binder et al., 2014) (Figure S1F). Compared with existing compendia of nuclear proteomes, for instance, the experimentally determined 824 proteins in Kislinger et al. (2006) (Figure S1G), the computationally defined proteins (~3,500) in Bauer et al. (2011) and Fink et al. (2008), and the approximately 4,220 proteins annotated as nuclear in Uniprot, our liver data achieved higher coverage. In fact, we covered nearly 70% of all known proteins expressed in the liver nucleus (Figure 1A) and close to 90% for proteins annotated as parts of nuclear compartments in mouse liver (Figures 1A and S1H). The coverage for proteins involved in important nuclear functions, such as transcription factors (TFs), transcriptional co-regulators, and RNA processing proteins, was above 60% (Figure 1B).

To study temporal regulations, we first analyzed the nuclear accumulation of protein involved in circadian rhythms. We could detect all the known components of the core clock, as well as clock-controlled TFs (e.g., members of PAR bZip family; Gachon, 2007; and E4BP4/NFIL3 in Figures 1C and 1D). All these components rhythmically accumulated in the nucleus with expected phases and amplitudes. Such rhythms were disrupted in clock-deficient *Cry1/2* double-knockout (DKO) mice (van der Horst et al., 1999), in which no CRY proteins could be detected (Figure S1I).

### Extensive Rhythms of Nuclear Protein Abundance Are Mainly Regulated at the Post-transcriptional Level

We identified 522 (13%, false discovery rate [FDR] = 5%) proteins that rhythmically accumulated in the nucleus, or 1,835 using a less stringent criterion (45%, FDR = 0.25) (Figure S2A; Table S2; related to Figure 2). Our previous characterization of the whole-cell rhythmic proteome using the exact same MS and analysis (Mauvoisin et al., 2014) identified only 195 rhythmic proteins (~5%, FDR = 0.25), indicating that the nuclear proteome is subject to extensively more diurnally rhythmic regulation. The 522 rhythmic nuclear proteins showed a bimodal peak time distribution similar to that in the total proteome (Mauvoisin et al., 2014), with peaks at the end of the light and dark periods (Figure S2B). In addition to an increased number of rhythmic proteins, nuclear proteins also displayed increased peak-to-trough amplitudes compared to total protein extracts, with maxima above 30-fold (Figure S2C). The potential contamination at ZT21 (sample 1) by cytoplasmic proteins had only a minor effect on the global analysis of rhythmicity (Figure S2D). The majority (400 out of 522) of the rhythmic proteins are known to localize in the nucleus or shuttle from cytoplasm to the nucleus (Figure 2A). These proteins showed a bimodal distribution of peak times, with maxima toward the end of day and night periods. Unexpectedly, a fraction (122 out of 522, 23%) of proteins annotated to be mostly cytoplasmic as well as constituents of the cytoskeleton showed rhythmic accumulation in the nucleus with a sharp phase distribution around ZT0, albeit with lower amplitudes compared to nuclear and shuttling proteins (Figures 2B and S2E).

We next denote nuclear/shuttling proteins as the C1 group and cytoplasmic/cytoskeleton proteins as C2. Strikingly, only a fraction of rhythmic nuclear proteins was encoded by rhythmic

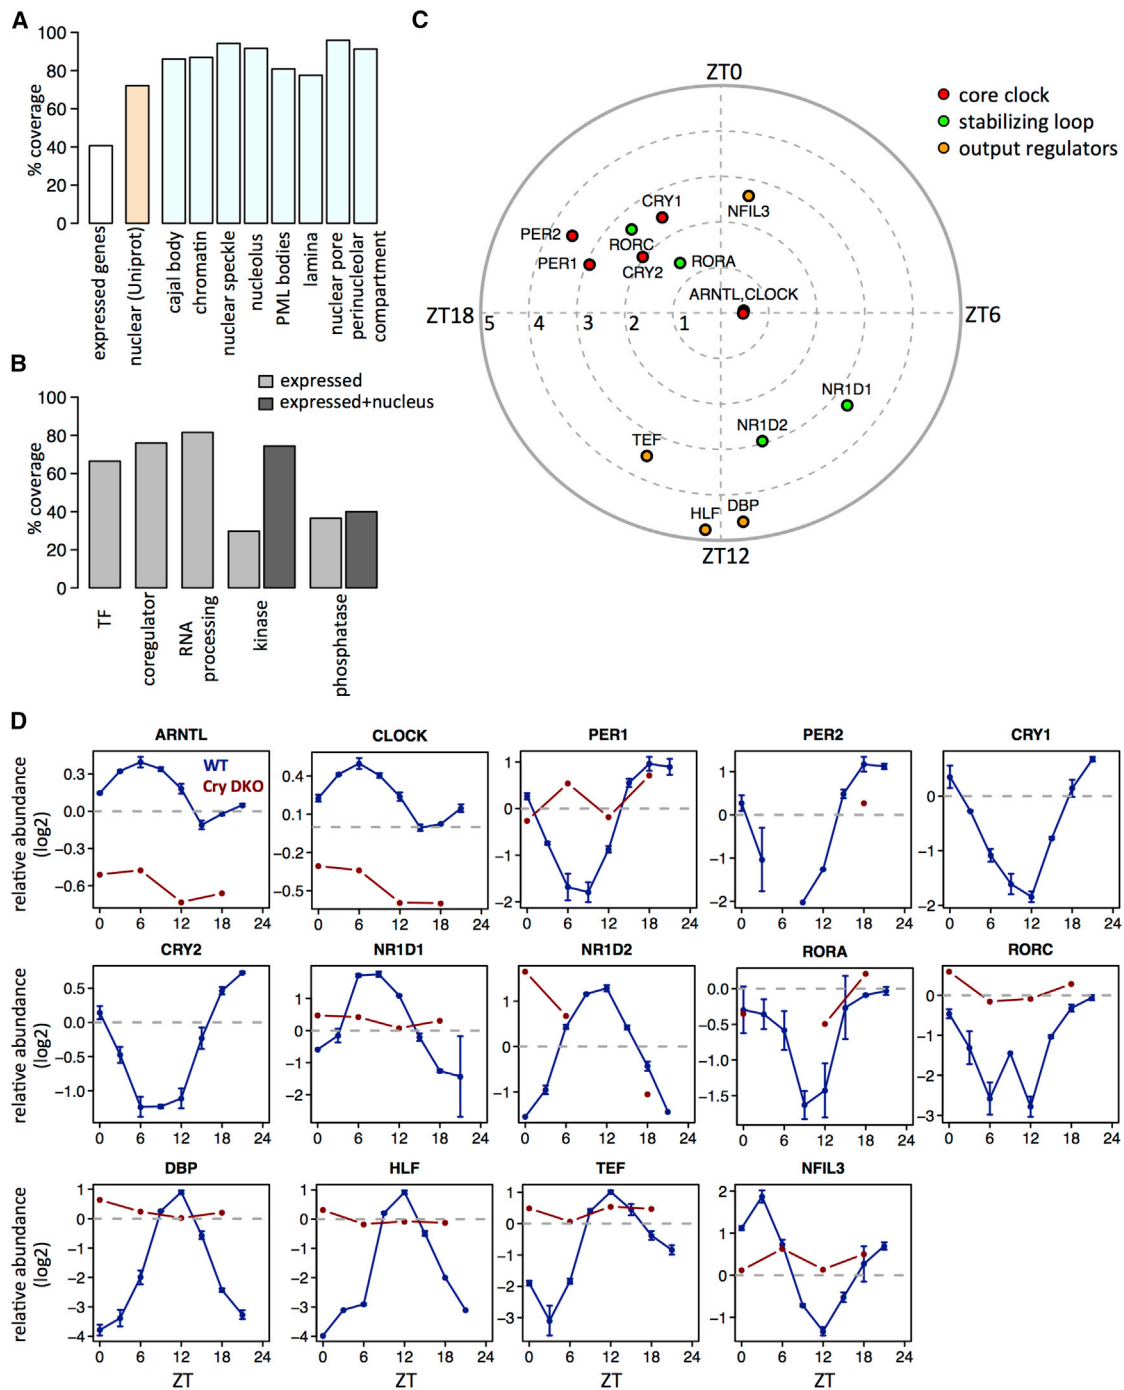

**Figure 1. High-Coverage Nuclear Proteome by SILAC-Based MS Identifies Robust Diurnal Rhythms in Core Clock and Clock-Regulated Proteins in Mouse Liver**

(A) Coverage of liver-expressed genes (assessed by RNA-seq, requiring mean reads per kilobase of transcript per million mapped reads [RPKM] > 0.5 in wild-type data from; Atger et al., 2015; white bar), annotated as nuclear (Uniprot, beige) and annotated as belonging to nuclear sub-compartments (light blue).

(B) Coverage of liver-expressed genes with specific functions. For kinases and phosphatases, the coverage, taking into account nuclear annotation, is also shown.

(C) Core clock and clock-regulated proteins quantified in the nuclear proteome. Phases and amplitudes are indicated by the angles and distances to the center, respectively.

(D) Temporal nuclear accumulations of individual proteins for wild-type (blue line) and *Cry1/2* DKO (red line). The error bars in wild-type represent SEM between two biological replicates.

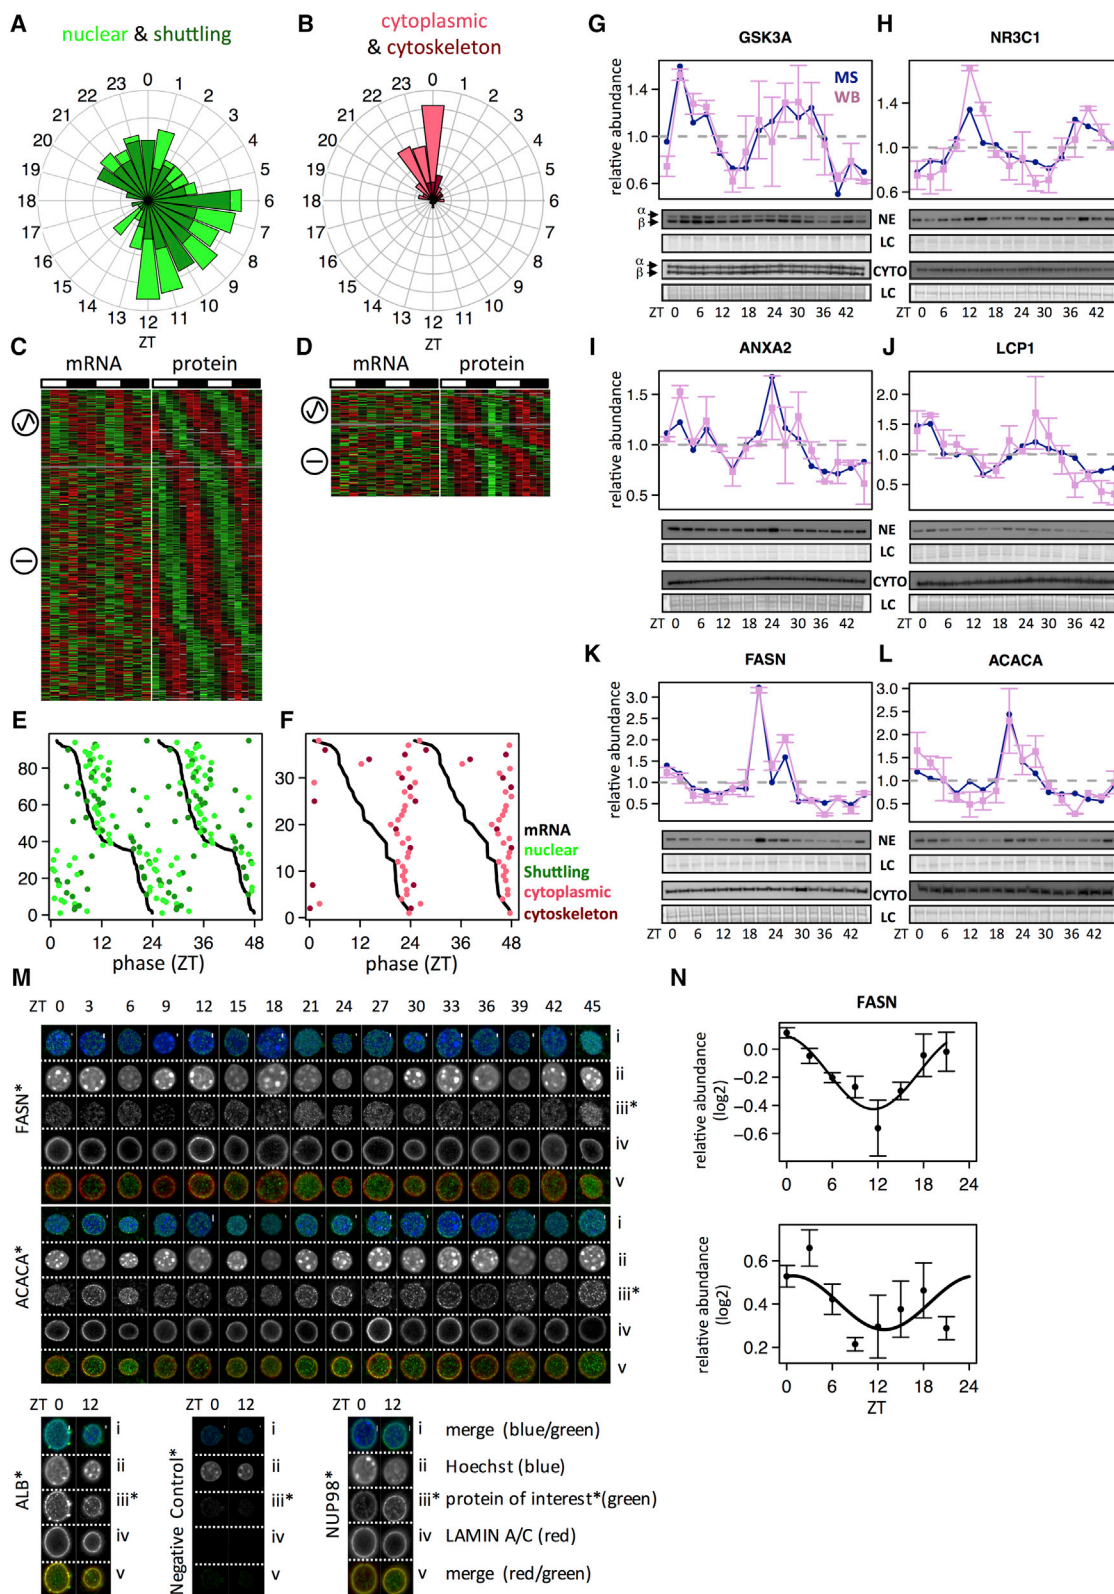

**Figure 2. Rhythm of Nuclear Proteins Is Mainly Regulated at the Post-transcriptional Level**

A total of 522 proteins were identified as rhythmic in nuclear extracts (FDR < 0.05). They were divided into two classes according to annotations of cellular localization: C1 for nuclear (n = 232) and shuttling proteins (n = 168); C2 for cytoplasmic (n = 94) and cytoskeleton proteins (n = 28).

(legend continued on next page)

mRNAs, quantified by RNA sequencing (RNA-seq) in the same light-dark (LD) and feeding conditions for both C1 (23%) and C2 (33%) (Figures 2C and 2D), highlighting the importance of post-transcriptional regulation in generating these rhythms in nuclear proteins. Among the fraction of proteins with corresponding rhythmic mRNAs, the phases of protein in C1 were highly correlated with the phases of their cognate mRNAs, with an average delay of 3 hr (Figures 2E and S2F). This delay is shorter than what we found for total proteins (Mauvoisin et al., 2014) and probably reflects short protein half-lives, which is supported by the observation that these proteins were enriched in TFs (Figure S2G). In contrast, the peak times of C2 proteins in the nucleus did not correlate with mRNA peaks (Figure 2F). Furthermore, only a small fraction of the rhythmic nuclear proteins also showed rhythms in total extracts for both C1 (6%) and C2 (17%) (Figure S2H), suggesting that the protein translocation from the cytoplasm into the nucleus is an important regulatory mechanism. The proteins with rhythms both in the total and nuclear extracts coincided with food-driven rhythmically secreted proteins (Mauvoisin et al., 2014) and showed a clear phase preference at ZT19 in the total and ZT22 in the nuclear extracts (Figure S2I).

To further assess the diurnal nuclear accumulation of proteins annotated as cytoplasmic, we independently quantified protein abundance in nuclear and cytoplasmic extracts using western blots (WBs) for proteins in both C1 (GSK3A and NR3C1 in Figures 2G and 2H) and C2 (ANXA2, LCP1, FASN, ACACA, and ALB in Figures 2I–2L and S2J). This confirmed the rhythms and peak accumulation times of these proteins in the nuclear extracts, while rhythms in the cytoplasmic extracts were absent. In addition, we performed immunofluorescence experiments on purified nuclei on the cytoplasmic proteins FASN, ACACA, and ALB, all showing rhythmic nuclear accumulation. Confocal microscopy indeed confirmed that these proteins rhythmically accumulate in the nucleus with the same phases as in the MS, whereas structural components of nuclei, LAMIN A/C, and NUP98 did not (Figures 2M, 2N, S2K, and S2L).

### Rhythmic Accumulation of Nuclear Protein Complexes

Many quantified nuclear proteins were subunits of well-characterized nuclear protein complexes. In fact, the subunit coverage

of known complexes was very high, even among ones with numerous subunits (Figure S3A; Table S3; related to Figure 3). Often, proteins belonging to the same complex showed highly similar diurnal profiles (Figures S3B and S3C). Since not all subunits of annotated complexes might follow the same temporal patterns, we identified nuclear protein complexes with synchronized rhythmic subunits using singular value decomposition (SVD). We retained complexes in which the fraction of variances captured by the first singular component was significant ( $p < 0.05$ ), and the rhythm of the complex was estimated from that of the first component (Experimental Procedures). Unexpectedly, such analysis yielded 360 complexes with synchronized subunits out of the 993 detected (at least two distinct subunits detected) (Figure S3D), of which 185 showed diurnal accumulation representing diverse functions, peak times, and amplitudes (Figure 3A). Some of these complexes showed low average amplitudes, potentially reflecting that some subunits are shared by multiple complexes not necessarily expressed in the same phase, or that amplitudes among subunits are heterogeneous (Figure S3E). Most of the complexes peaking during the day were involved in transcriptional regulation and DNA repair, whereas ones peaking at night are more enriched in cytoskeleton organization, protein transport, proteolysis, and chaperoning of proteins (Figures 3A–3G). Of note, the multimeric kinases AMPK and CKII, involved in circadian clock regulation (Lamia et al., 2009; Maier et al., 2009; Tamaru et al., 2009), both show rhythmic nuclear accumulations with a maximum at the end of the dark period (Figure 3H). Hence, our results strongly suggest temporal compartmentalization of fundamental nuclear processes in the liver.

### Temporal Organization of Ribosome Biogenesis and DNA Repair

The functions of rhythmic nuclear proteins and complexes pointed toward temporal organization of ribosome biogenesis and DNA repair. Ribosome biogenesis was represented by 99 proteins showing different phases of nuclear accumulation, corresponding to distinct steps (de la Cruz et al., 2015) (Figure 4A; Table S4; related to Figure 4). First, proteins involved in rRNA transcription, including RNA polymerase I subunits, showed a maximum nuclear accumulation around ZT6, consistent with the transcription of the 45S rRNA (Jouffe et al., 2013) (Figure S4A;

(A) Peak time distributions in ZT for proteins in C1 (nuclear, light green; shuttling, dark green).

(B) Same as (A) for C2 (cytoplasm, light red; cytoskeleton, dark red).

(C and D) Heatmap representation of proteins in C1 (C) and C2 (D) and their corresponding mRNAs measured by total RNA-seq in the same experimental conditions (LD and night-restricted feeding) (Atger et al., 2015). Data were standardized by rows, and gray blocks indicate missing data. Sinusoidal icon means rhythmic mRNA, and straight line constant mRNA.

(E and F) For rhythmic proteins encoded by rhythmic mRNA (FDR < 0.05), phase correlations between proteins and mRNAs for C1 (E) (statistically significant with  $p < 10^{-15}$ , circular correlation test) and C2 (F) (not significant with  $p = 0.21$ ).

(G–L) Examples of rhythmic proteins in C1 (G, GSK3 $\alpha$  [quantified] and GSK3 $\beta$ ; H, NR3C1) and C2 (I, ANXA2; J, LCP1; K, FASN; and L, ACACA) confirmed by western blot (WB) analysis in nuclear extracts (NE; upper blots) and cytoplasmic extracts (CYTO; lower blots). The two biological replicates are shown as ZT0–ZT21 (replica 1) and ZT24–ZT45 (replica 2). MS and WB data are normalized to the temporal mean, and the 16 time points show the mean and SEM from two independent biological samples. Naphtol blue-black staining of the membranes was used as a loading control (LC) and serves as a reference for normalization of the quantified values.

(M) Examples of rhythmic proteins in C2 (FASN, ACACA, and ALB) detected in the nucleus by confocal microscopy. Secondary antibodies alone were used as negative control and the nuclear pore complex NUP98 as positive control. Nuclei were stained and confocal z stack images were acquired at 0.20  $\mu\text{m}$  intervals (see z stacks in Figure S2K). Vertical white scale bars represent 1  $\mu\text{m}$ .

(N) Densitometry analyses for proteins FASN (peak time = 23.4 hr, rhythmicity test with  $p < 10^{-4}$ ) and ACACA (peak = 0.8 hr,  $p = 0.11$ ) with confocal signal (iii) normalized by LAMIN A/C signal (iv) from (M). Data show the mean and SEM from at least three nuclei.

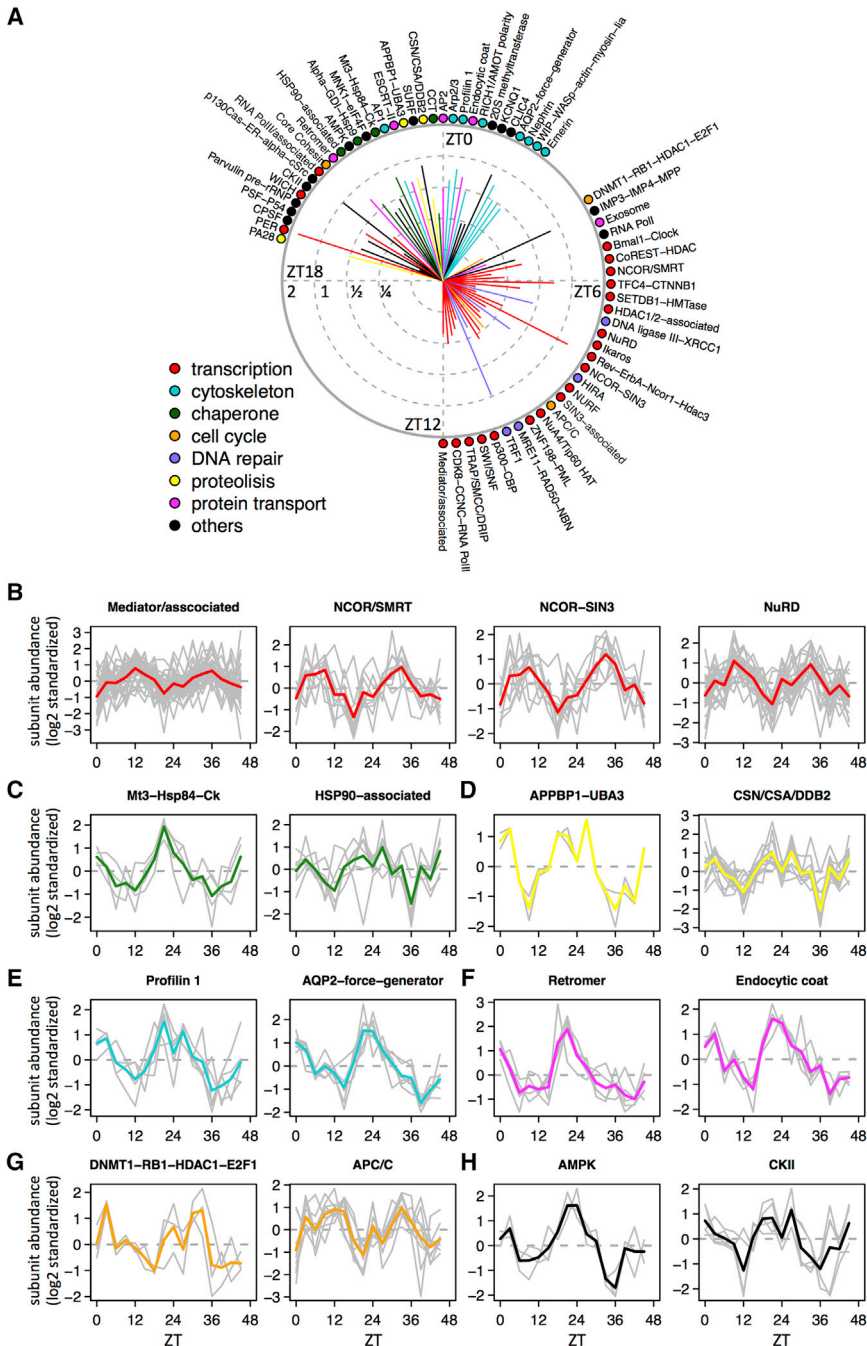

**Figure 3. Diurnal Accumulation of Nuclear Protein Complexes**

(A) Nuclear protein complexes with rhythmic accumulation were identified by the singular value decomposition (SVD). Peak times (identified from the first eigengene in the SVD) and mean peak-to-trough amplitudes (mean of amplitudes of rhythmic subunits within the same complex) are indicated by the angles (reference ZT times are indicated) and length of associated solid lines (the tick labels show  $\log_2$  amplitudes). Specific functions of these rhythmic complexes are color coded.

(B–H) Temporal profiles of subunits of some rhythmic nuclear protein complexes are shown, e.g., mediator/associated, NCOR/SMRT, NCOR-SIN3, and NuRD complexes for transcription (B); Mt3-Hsp84-Ck and HSP90-associated complexes for chaperone (C); APPBP1-UBA3 and CSN/CSA/DDB2 complexes for proteolysis (D); Profilin 1 and AQP2-force-generator complexes for cytoskeleton (E); retromer and endocytic coat complexes for protein transport (F); DNMT1-RB1-HDAC1-E2F1 and APC/C complexes for cell cycle (G); and AMPK and CKII complexes for kinases (H).

(LSU) (McCann et al., 2015) with peak phases near ZT22 (Figure S4A). Altogether, ribosome biogenesis, one of the most energy-consuming cellular processes (Warner, 1999), appeared diurnally and sequentially orchestrated, possibly to occur in sync with sufficient nutrient availability.

DNA repair, a crucial process for the maintenance of genome integrity (Ciccio and Elledge, 2010) (Figure 4B; Table S4), was represented by 96 rhythmic nuclear proteins. The majority of rhythmic proteins involved in DNA repair peak between ZT7 and ZT12 (Figure S4B). Enzymatic DNA repair (Martineau-Pivoteau et al., 1996) and telomere maintenance (Chen et al., 2014) were shown to have maximum activity during the night, whereas nucleotide excision repair (NER) peaked at the end of the light period (Kang et al., 2009), like other processes

related to Figure 4). Proteins and complexes involved in rRNA processing and pre-ribosome assembly also peaked at ZT6, including the small-subunit processome (SSU) (Phipps et al., 2011), the PeBoW complex (Lapik et al., 2004), and the exosome (Lykke-Andersen et al., 2009) (Figures 4A and S4A). Second, rRNA synthesis and maturation during the day were followed by ribosomal protein synthesis, shown to take place in the cytoplasm around ZT18 (Atger et al., 2015; Jouffe et al., 2013). Lastly, the final assembly of the ribosomes in the nucleolus involves the rhythmic nuclear accumulation of the pre-60S ribosome (Nissan et al., 2002) and the large-subunit processome

involved in ionizing radiation-induced DNA damage (Palombo et al., 2015). The circadian clock has been involved in the process (Fu et al., 2002; Kang et al., 2010). Here, we found that the proteins involved in all DNA repair mechanisms show a rhythmic nuclear accumulation (Figures 4B and S4C). In addition, we observed enrichment in proteins involved in DNA replication-associated DNA repair around ZT9 (Mjelle et al., 2015), corresponding to the time of maximal diurnal DNA synthesis in mouse liver (Barnum et al., 1958; Echave Llanos et al., 1970). This observation suggests that increased DNA repair activity may be associated with increased DNA replication around ZT9.

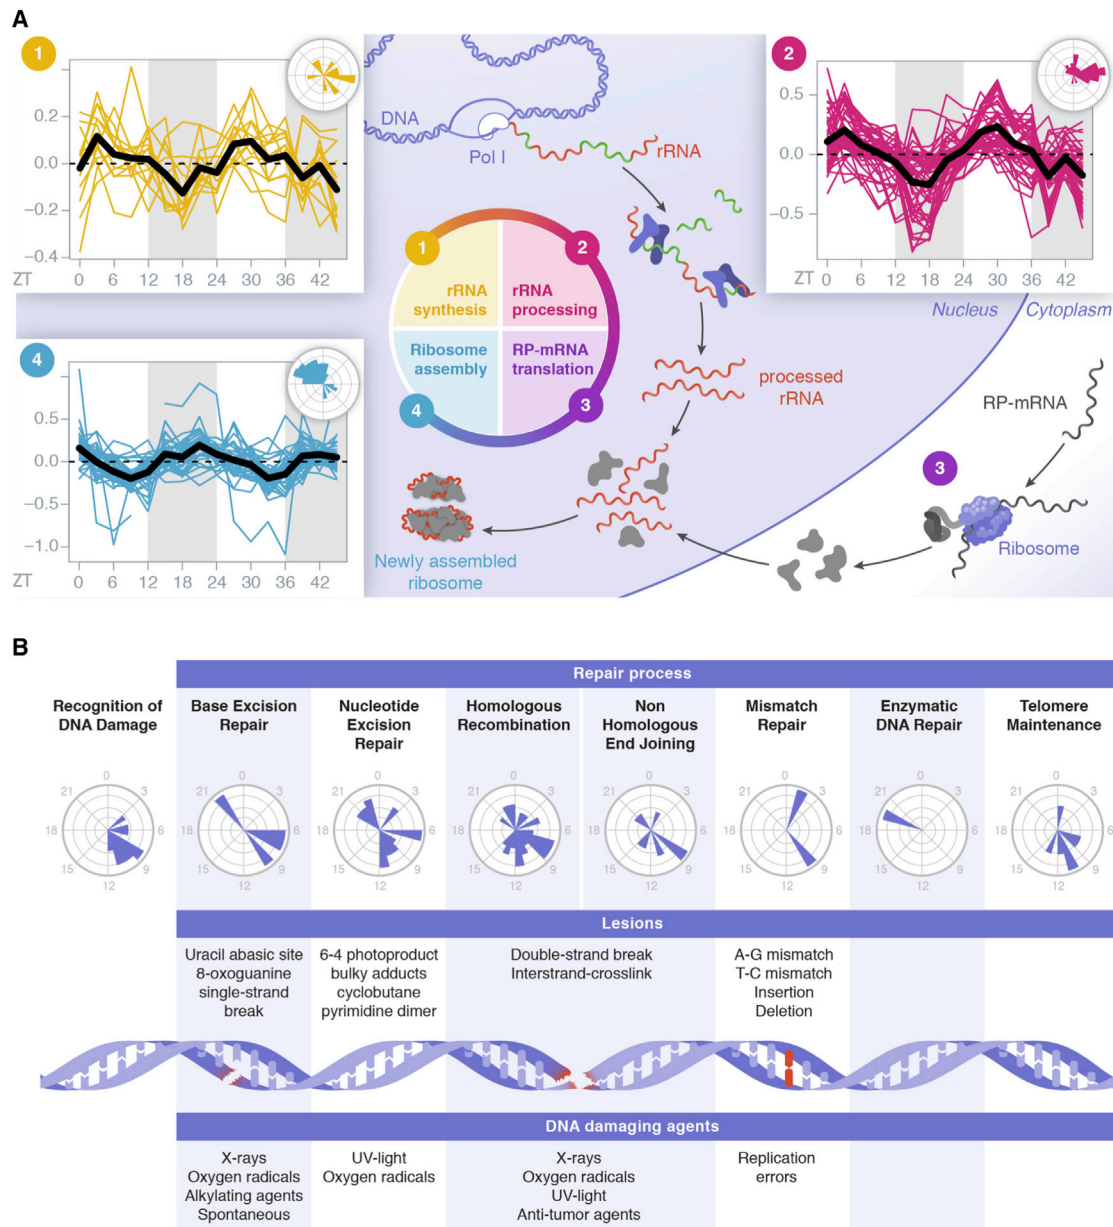

**Figure 4. Temporal Organization of Ribosome Biogenesis and DNA Repair**

(A) Temporal accumulations and phase distributions of rhythmic nuclear proteins involved in sequential steps of ribosome biogenesis, namely rRNA synthesis (1) and processing (2), and ribosome assembly (4). Temporal profiles of several complexes involved are found in Figure S4B.

(B) Peak time distributions of rhythmic nuclear proteins in the different mechanisms involved in DNA repair. Temporal profiles of several complexes involved are found in Figure S4C.

### Diurnal Nuclear Phosphoproteome and Predicted Rhythmic Kinase Activities

Phosphorylation is involved in the regulation of both core clock and clock outputs (Reischl and Kramer, 2011). We found two kinase complexes, AMPK and CKII, showing diurnal accumulation in the nucleus (Figure 3H). To further study the diurnal phosphoproteome and its associated kinome activity, we used the same nuclear extracts and performed SILAC MS after enriching for phosphopeptides. Among the 4,689 phosphosites identified, 1,448 could be quantified in at least 8 out of 16 samples and

mainly comprised phospho-serine (Figure S5A; related to Figure 5). The limited ratio of quantified over identified phosphopeptides came from a limitation of the SILAC technique, for which only lysine-containing phosphopeptides can be quantified. In total, 154 of these quantified phosphosites (11%), distributed within 113 canonical proteins, showed rhythmic nuclear accumulation (FDR < 5%) (Table S5; related to Figure 5), with a bimodal distribution of peak times located in the middle of the day (ZT7) and night (ZT21), and amplitudes up to 60-fold (Figures S5B and S5C). We could compare the rhythmic phosphorylation



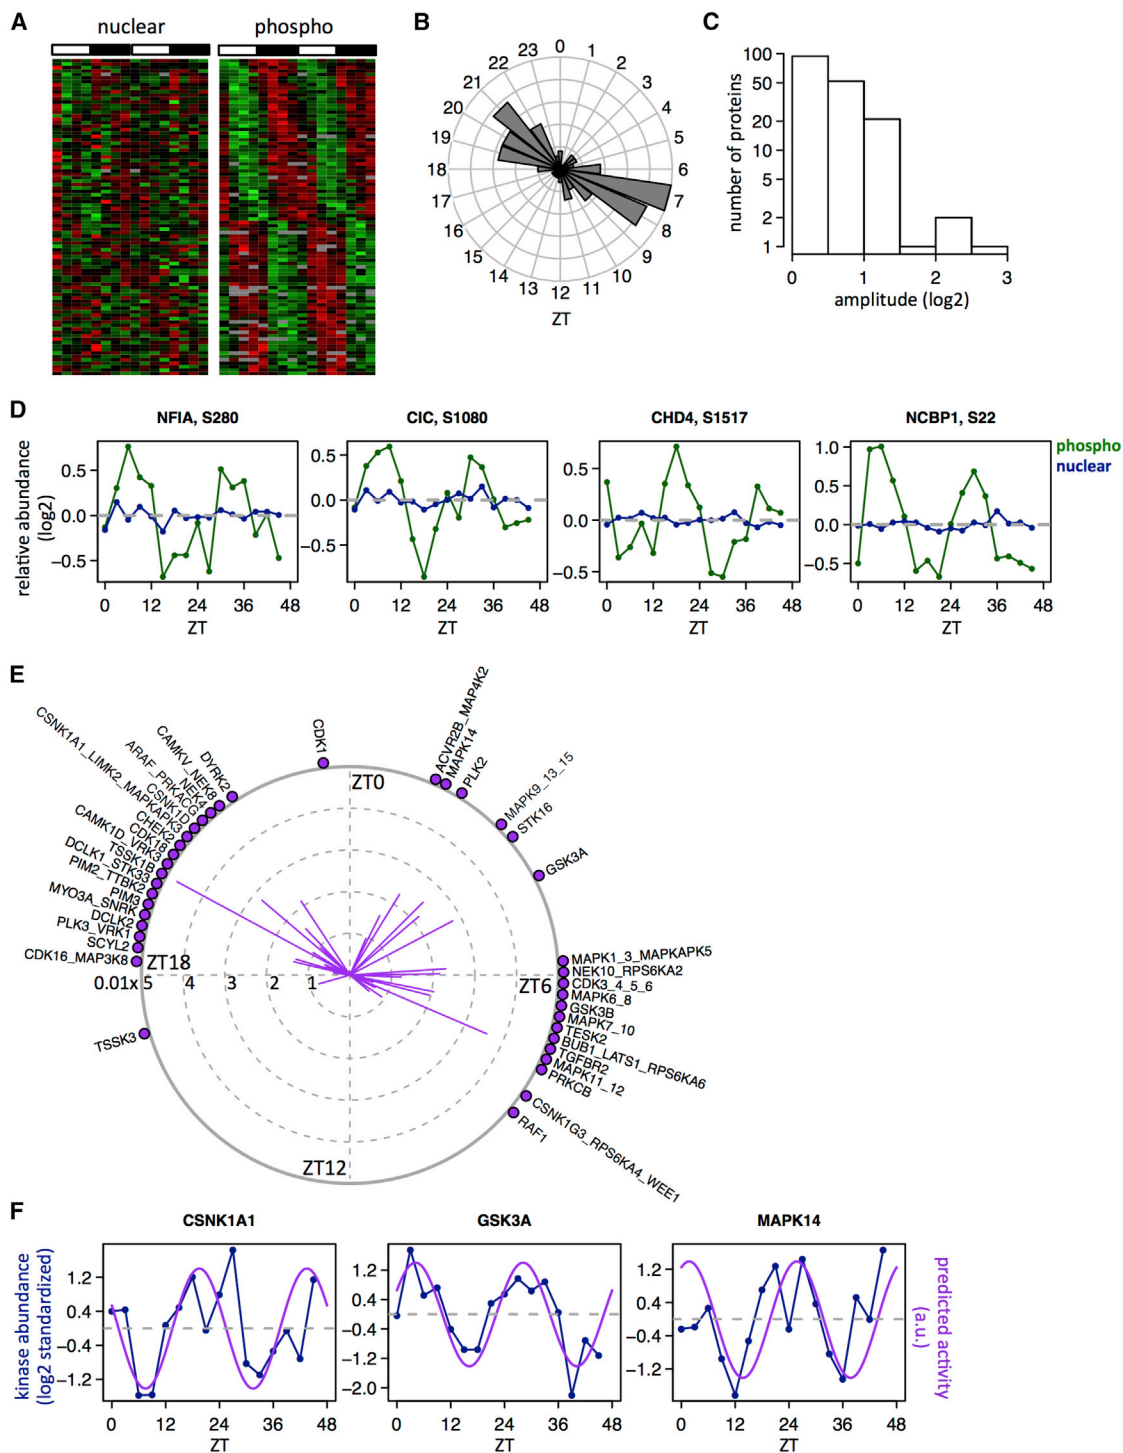

**Figure 5. Rhythmic Nuclear Phosphorylation and Inferred Kinase Activities**

(A) Heatmap representation of rhythmically phosphorylated peptides ( $n = 92$ , right panel) with associated non-rhythmic nuclear proteins (left panel).

(B and C) Phase (B) and peak-to-trough (C) amplitude (log<sub>2</sub>) distributions for rhythmic nuclear phosphoproteins in (A).

(D) Individual examples of rhythmic phosphorylated sites (blue line, nuclear proteins; green line, nuclear phosphosites).

(E) Kinase motifs displaying rhythmic activities inferred from non-rhythmic nuclear proteins containing rhythmic phosphorylation sites through a linear model with elastic-net regularization. Direction of lines indicates peak activity times, and distances to the center of solid lines indicate activity amplitudes of each motif.

(F) Inferred rhythmic activities of CSNK1A1, GSK3A, and MAPK14 compared with their respective nuclear protein accumulations.

levels with the levels of the corresponding proteins for ~90% of identified phosphoproteins (Figure S5D). To identify putative rhythmic phosphorylation activities, we distinguished two classes of rhythmic nuclear phosphosites, those with or without corresponding rhythmic nuclear protein accumulation (FDR < 0.05). The first class of phosphosites (n = 52, 36%) with rhythmic nuclear proteins showed biphasic phase distribution and the same high amplitudes as the corresponding proteins (Figures S5E–S5G). Also, the rhythms of phosphosites were highly correlated to the rhythms of nuclear proteins (Figures S5H and S5I), indicating that rhythmic phosphorylation passively reflects the rhythmic protein accumulation. Rhythmic phosphosites in the second class (64%) corresponded to non-rhythmic proteins (Figure 5A) and showed a similar biphasic peak time distribution (Figure 5B), but had more moderate amplitudes compared to the first class (Figure 5C). Such rhythms (examples in Figure 5D) suggested active regulation of phosphorylation by either kinases or phosphatases. We exploited known kinase specificities (Hu et al., 2014) to identify putative kinases with rhythmic activities. Using two methods, a linear model and phase enrichment analysis (Experimental Procedures), we predicted 39 kinase motifs with rhythmic activities (Figure 5E; Table S5). Three of these predicted kinases were detected in the nuclear proteome and showed rhythmic accumulation with the same phases as the predicted corresponding motif activities (Figures 5F and S5J), suggesting that in those cases the rhythmic phosphorylation is regulated by the cyclic nuclear accumulation of the kinase. Among these kinases, several were known as regulators of the circadian clock. For example, GSK3 $\alpha$  and GSK3 $\beta$ , which are known to phosphorylate and regulate BMAL1, CLOCK, and REV-ERB $\alpha$  (Reischl and Kramer, 2011), presented a maximum activity and/or nuclear accumulation during the day, whereas CKI $\alpha$  and CKI $\delta$ , known as regulators of PER proteins, showed a maximum activity and/or nuclear accumulation during the night. In addition, we predicted several kinases involved in the regulation of the cell cycle as having diurnal activities. Notably, the cell-cycle-related kinases CDK4 and CDK6 showed a maximum activity around ZT6, whereas CDK1 had a maximum activity around ZT23, in opposite phase to its inhibitory kinase WEE1 (Vermeulen et al., 2003).

### Comprehensive Diurnal Transcriptional Landscape in Mouse Liver

Proteins involved in transcription regulation were highly represented among rhythmic nuclear proteins and phosphoproteins (Table S6; related to Figure 6). Indeed, we identified 80 TFs and 99 transcription co-regulators showing robust diurnal nuclear accumulation (FDR < 0.05; Figures 6A and S6A–S6D; related to Figure 6). Of those, the rhythms of 16 TFs and 17 co-regulators persisted in *Cry1/2* DKO mice (Figures 6A, S6B, and S6D), indicating that these are most likely driven by feeding rhythms. Among the rhythmic TFs identified in wild-type, we found core clock components, known clock output regulators (e.g., DBP, HLF, TEF, and NFIL3), and factors previously shown to be involved in the coupling between the clock and metabolism—for example, HSF1 (Reinke et al., 2008), FOXA family members (Rouyer et al., 1997), the sterol-regulated SREBP1 (Gibaldi et al., 2014), and ETS family members, recently predicted to be implicated in diurnal transcriptional activity in mouse liver

(Fang et al., 2014). Among other identified rhythmic TFs, many are related to hormone and metabolic regulations, involving several nuclear receptors, notably GR (NR3C1), MR (NR3C2), NR1H4, PPAR $\alpha$ , and PPAR $\delta$ . We also noted the starvation/feeding-dependent regulator of autophagy TFEB and ZKSCAN3 (Chauhan et al., 2013; Settembre et al., 2013), possibly linked with rhythmic autophagy in mouse liver (Ma et al., 2011). Another intriguing observation is the opposite phase between the antagonistic regulators of liver zonation TCF4 (encoded by the *Tcf7l2* gene) and HNF4 $\alpha$  (Gougelet et al., 2014).

We next assessed whether these diurnally accumulating TFs in the nucleus induced rhythmic transcriptional activities. Specifically, we used RNA-seq data under the same LD and night-restricted feeding conditions (Atger et al., 2015) and considered pre-mRNA accumulation as a proxy for transcription (Gaidatzis et al., 2015). We then modeled transcription output as a linear combination of transcriptional activities associated with known DNA binding motifs of TFs (Balwierz et al., 2014; Rey et al., 2011) located within DNase 1 hypersensitive regions (from mouse ENCODE) and near gene promoters in mouse liver (Figure S6E; Table S6). The availability of nuclear protein expression patterns allowed us to make more specific hypotheses regarding the proteins responsible for time-specific transcriptional activities. In particular, the delays between TF accumulations and maximal predicted activities of cognate motifs showed a bimodal distribution around 0 and 12 hr (Figure 6B). Strikingly, TFs annotated as transcriptional activators tended to peak in phase with their motif activities, while repressors were in opposite phase with motif activities. For example, the RORE element was predicted as maximally active near ZT21, which coincided with maximal expression of the activators RORA/RORC, while the repressors NR1D1/NR1D2 (REV-ERB $\alpha$  and REV-ERB $\beta$ ) peaked in opposition (Figure 6C). Further examples included the E-box, with ARNTL (BMAL1) and CLOCK (activators); the D-box and DBP, HLF, TEF (activators), and NFIL3 (repressors); as well as nuclear receptors and regulators of hepatic metabolism, including the recently proposed ETS family members (Fang et al., 2014) (Figures 6C and S6F).

Many of the transcriptional co-regulators with acetylase and deacetylase, or methylase and demethylase activities, quantified in our dataset showed a rhythmic nuclear accumulation, with peak phases between ZT6 and ZT12 (Figures S6G and S6H). We tested for correlations between the rhythm of these enzymes and global changes in histone acetylation and methylation by WB (Figure S6I). Despite a general decrease in histone modification near ZT10, we did not detect clear rhythm of these modifications, consistent with genome-wide chromatin immunoprecipitation (ChIP) studies on those histone marks (Le Martelot et al., 2012; Vollmers et al., 2012). In sum, the measured accumulation rhythms of many transcription regulators significantly help understanding the origins of diurnal rhythms in transcription.

### Rhythmic Orchestration of Polyploidy in Mouse Liver

Numerous rhythmic nuclear proteins, phosphosites, and transcriptional activities are involved in cell-cycle regulations, which occurred at specific times during the day in a consistent temporal ordering (Figure 7A). Indeed, PLK2 kinase activity is involved in centriole duplication at the G1/S transition (Warnke et al.,



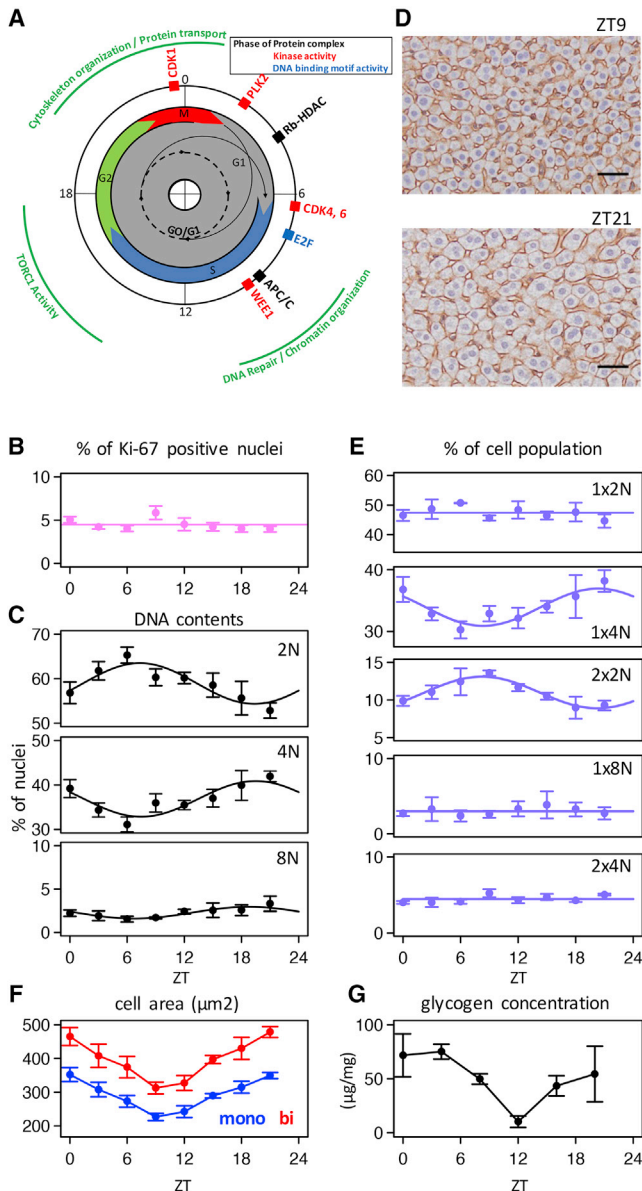

**Figure 7. Diurnal Orchestration of Polyploidy in Mouse Liver**

(A) Summary of cell-cycle markers identified by the analysis of nuclear proteome and phosphoproteome (outer circle) and inferred temporal windows of cell-cycle phases around the clock (inner disk).

(B) Proportion of Ki-67-positive nuclei around the clock. Each of these eight time points shows the mean and SEM of four independent biological samples.

(C) Proportions of nuclei with different DNA contents (2N, 4N, and 8N) measured by FACS analysis show diurnal variations. Each of these eight time points shows the mean and SEM of four independent biological samples. Cosine-fit curves are also shown.

(D) Representative IHC images of mouse liver sections harvested at ZT9 and ZT21 (4  $\mu$ m thick liver slices). Plasma membrane is stained using  $\beta$ -catenin, and Mayer's hematoxylin is used for nuclear staining. Horizontal black scale bars represent 40  $\mu$ m.

(E) Proportions of mono- (1  $\times$  2N) and bi-nucleated diploid (2  $\times$  2N), mono- (1  $\times$  4N) and bi-nucleated tetraploid (2  $\times$  4N), and mono-nucleated octaploid (1  $\times$  8N) hepatocytes around the clock extracted from IHC image analysis. Each time point shows the mean and SEM of four independent biological samples.

M phase entry is controlled by the CDC25-dependent activation of cyclin B-CDK1 complex and characterized by the increased phosphorylation of histone H3 on Ser10 (Figure S7C) (Hendzel et al., 1997) and important modifications of the cellular cytoskeleton (Heng and Koh, 2010). Considering the maximum CDK1 activity found at the end of the night period (Figure 5E) synchronized with maximum nuclear localization of complexes involved in cytoskeleton organization (Figure 3), it is plausible that M phase occurs near the night-day transition, which is temporally consistent with the mitotic activity observed following partial hepatectomy (Matsuo et al., 2003).

Thus, all evidence pointed toward aligned diurnal and cell cycles (Bieler et al., 2014; Feillet et al., 2014), which was surprising given that normal livers of 8- to 12-week-old mice are not actively proliferating. We estimated the fraction of cycling cells by staining for Ki-67 and found  $\sim$ 5% of positive nuclei throughout the day (Figure 7B). In the absence of clear readouts concerning rhythmic cell division, we investigated whether the detected cell-cycle activities might be linked with ploidy, since polyploidy in hepatocytes of adult mouse is widespread and increases with age (Gentric and Desdouets, 2014). We thus analyzed DNA content of liver nuclei by flow cytometry. Surprisingly, this revealed antiphasic proportions of diploid nuclei (with two copies of chromosomes, 2N) compared to tetraploid nuclei (4N) (Figure 7C), suggesting a daily pattern of polyploidy. We then performed histological slices of mouse liver, which, in addition to DNA content, also allowed us to monitor the number of nuclei per cell, as well as the cell sizes (Figures 7D, 7E, and S7E–S7G). The fraction of bi-nucleated cells showed a diurnal pattern with maximum at ZT9 (Figure S7E). Using nuclear size to estimate DNA content (Figures S7F and S7G) (Martin et al., 2002), we could distinguish a number of hepatocyte subtypes. This revealed that the observed rhythm of DNA content (Figure 7C) came from two populations of cells, namely bi-nucleated diploid (2  $\times$  2N) and mono-nucleated tetraploid (1  $\times$  4N) cells, oscillating in opposite phases, while other populations showed no rhythm (Figure 7E). Moreover, we also observed a dramatic diurnal rhythm (60% increase at the peak) in hepatocytes size, both for mono- and bi-nucleated cells, with a maximum size at the night-day transition (Figure 7F), in agreement with previous reports (Echave Llanos et al., 1971; Gerber et al., 2013). This rhythm was in sync with the glycogen content (Figure 7G), consistent with reports that insulin-dependent cell swelling might positively regulate glycogen synthesis (Lang et al., 1998). Thus, although the liver constitutes a largely quiescent organ, we uncovered a diurnal rhythm in polyploidy.

## DISCUSSION

Though recent whole-cell diurnal proteomics studies could detect more than 5,000 proteins, the coverage of lowly expressed regulatory proteins such as TFs was poor (Chiang et al., 2014; Mauvoisin et al., 2014; Robles et al., 2014). To

(F) Diurnal oscillations of cell areas for mono- and bi-nucleated hepatocytes extracted from IHC image analysis. Each time point shows the mean and SEM of four independent biological samples.

(G) Temporal liver glycogen concentration. Each time point shows the mean and SEM of three independent biological samples.

reduce sample complexity, we here performed a proteomics and phosphoproteomics analyses of liver nuclei, while a similar strategy recently analyzed diurnal rhythms in the mitochondria (Neufeld-Cohen et al., 2016). Combining the accuracy of the SILAC technology with time-series sampling in the liver allowed us to reach above 70% coverage of the nuclear proteome. The obtained signals allowed quantifications of all core-clock components and many clock-controlled output TFs, in wild-type mice as well as in clock-disrupted *Cry1/2* DKO mice, with temporal patterns that showed comparable quality as ones obtained in transcriptome studies (Figure 1). These time series data allowed us to show that the nuclear proteome is subjected to very significant diurnal regulation (Figure 2A) orchestrated mainly at the post-transcriptional level. As the diurnal regulation of translation efficiency was recently shown to concern only a few classes of genes (Atger et al., 2015), our findings suggest that the diurnal regulation of protein stability and nuclear transport of complexes are likely the most important causes of rhythms in nuclear protein abundance (Figure 2). In particular, our quantitative and temporal approach allowed us to dynamically monitor well-studied nuclear protein complexes (Figure 3). This dynamic complexome identified complexes peaking during the day, which were involved in transcriptional regulation and also DNA repair. Of interest, the proteins involved in DNA repair (Figure 4) constitute 18% of the rhythmic proteins identified and are synchronized with the predicted time of DNA replication. On the other hand, complexes peaking during the night were enriched in cytoskeleton organization, protein transport, proteolysis, and chaperoning of proteins, suggesting a temporal compartmentalization of generic biological functions of the liver nucleus. Also, the translation of components of ribosomes and the translation machinery occurred during the night, when nutrients are available. In fact, ribosome biogenesis, representing 18% of the identified rhythmic nuclear proteome, was rhythmically orchestrated in accordance with our previous work (Atger et al., 2015; Jouffe et al., 2013) (Figure 4).

We then performed a temporal nuclear SILAC phosphoproteome quantification, which identified hundreds of rhythmic phosphorylation sites and allowed us to infer rhythmic kinase activities (Figure 5). Although we cannot exclude the contribution of rhythmic phosphatase activities (Reischl and Kramer, 2011), some of the predicted kinase activities most probably originate from the synchronized accumulation of the kinases in the nucleus, as seen for CSNK1A1, GSK3A, and MAPK14 (Figure 5F). Phosphorylation events can also regulate transcriptional activity. In addition, for the 80 TFs and 99 co-regulators showing diurnal rhythms in our nuclear proteomic screen, our phosphoproteome approach also identified numerous TFs and co-regulators with rhythmic phosphorylation sites (Figure 6). We also identified rhythmic TFs whose rhythms persisted in clock-disrupted mice, which allows us to distinguish effects of the circadian clock versus metabolic cues and feeding/fasting-driven regulation of diurnal transcription. Comprehensive and temporal measurements on the abundance of transcription regulators in nuclei are clearly powerful to explain rhythms in mRNA transcription, since most previous efforts were limited to indirect computational inference using DNA motifs (Bozek et al., 2009; Fang et al., 2014; Rey et al., 2011).

In addition to the diurnal regulation of transcription, DNA repair, and ribosome biogenesis, one striking observation consisted in the diurnal orchestration of cell-cycle activities and the modifications of cell morphology and size (Figure 7). Modification of hepatocyte size, and even liver size, was previously observed (Echave Llanos et al., 1970, 1971; Gerber et al., 2013; Leveille and Chakrabarty, 1967), but the mechanisms are not fully explained. Maximal hepatocyte size occurred during the hepatocyte growth phase (Figure 7F), in phase with maximal glycogen synthesis (Figure 7G), but also ribosome biogenesis (Figure 4A), which is a proxy for protein synthesis. Meanwhile, the shrinking phase corresponded to glycogen breakdown and liver protein secretion (Mauvoisin et al., 2014). However, the typical fraction of liver mass represented by glycogen is about 5%, which is small compared to the observed 60% increase in cell size. The regulation of cell volume was shown to play an important role in hepatocyte metabolism, including glycogen (Baquet et al., 1990) and protein synthesis (Stoll et al., 1992), both of which are stimulated by cell swelling and inhibited by cell shrinkage, in the absence of other stimuli (Lang et al., 1998), implicating that cell size fluctuations could even be the cause of these phenomena. Among the several factors reported to regulate cell size, insulin is an important regulator of cell swelling, which is counteracted by the opposite action of glucagon (Schliess and Häussinger, 2003). In parallel, insulin can also induce actin polymerization (Theodoropoulos et al., 1992), a phenomenon linked to hepatocyte swelling (Gerber et al., 2013). Thus, insulin signaling may partly exert its influence on rhythmic liver metabolism via the regulation of cell size and hepatocyte structure. Diurnal hepatocyte swelling may also be associated with the observed nuclear accumulation of cytoplasmic proteins when cells reached their largest size (Figures 2B and 7F). Indeed, while this might also reflect the presence of nucleoplasmic structures (Malhas et al., 2011), recent studies in cancer cells showed that cellular and nuclear deformation, following cell migration, caused nuclear envelope rupture, followed by entry of cytoplasmic proteins (Denais et al., 2016; Raab et al., 2016). Such migration involves the same cytoskeleton complexes that we found to accumulate rhythmically at the night-day transition (Figure 3A) (Etienne-Manneville, 2013).

Finally, we observed diurnal fluctuation of hepatocyte ploidy. Namely, the fraction of bi-nucleated diploid hepatocytes peaked during the day, and mono-nucleated tetraploid hepatocytes peaked in opposite phase during the night, similar to observations in rat liver (Barbărasă, 1976; Bucher and Suppan, 1967). In liver, polyploidy increases with age and stress and is thought to confer resistance to xenobiotic or nutritional injuries (Gentric and Desdouets, 2014). However, depending on the type of ploidy, hepatocytes do not have the same capacity to divide after partial hepatectomy. Namely, while both mono- and bi-nucleated cells entered the cell cycle, only a few of them fully completed cell division. Indeed, only bi-nucleated cell number decreases during regeneration, showing their important contribution to the hepatocyte repopulation by giving rise to two daughter cells (Miyaoaka et al., 2012). Interestingly, liver regeneration after partial hepatectomy (Barbason, 1970; Matsuo et al., 2003; Souto and Llanos, 1985) follows a diurnal rhythm with more rapid regeneration when the liver damage occurred around ZT8, when bi-nucleated diploid cells reach their

maximum level (Figure S7E). It is thus conceivable that the diurnal proportion of these bi-nucleated diploid cells might be responsible for the observed diurnal liver regeneration.

In conclusion, our *in vivo* measured quantitative nuclear temporal proteomes and phosphoproteomes contribute an important step toward the identification of a new diurnal biological function orchestrated by the circadian clock and/or feeding rhythms.

## EXPERIMENTAL PROCEDURES

### Animals

Animal studies conformed to the regulations of the veterinary office of the Canton of Vaud. *Cry1/2* DKO mice (van der Horst et al., 1999) in the C57BL/6J genetic background are described in Bur et al. (2009). Ten-week-old mice had free access to food and water in 12 hr light/12 hr dark cycles under standard animal housing conditions. For all experiments, animals were fed only at night starting 4 days before the experiment to control for genotype-dependent feeding rhythms. SILAC mice were prepared as previously described (Krüger et al., 2008; Mauvoisin et al., 2014).

### Preparation of Whole-Cell Protein Extracts

Whole-cell extracts (TEs) were prepared as described in the Supplemental Experimental Procedures.

### Preparation of Nuclei and Cytoplasmic and Nuclear Protein Extracts

Nuclei were purified and extracts prepared as described in the Supplemental Experimental Procedures.

### SILAC-Based MS Analysis of Nuclear Proteomics and Phosphoproteomics

Tandem MS (MS/MS)-based SILAC proteomic analysis is mostly done as previously described (Mauvoisin et al., 2014) (details in Supplemental Experimental Procedures). Raw MS data and search engine outputs were deposited in the ProteomeXchange Consortium ([proteomexchange.org](http://proteomexchange.org)) via the PRIDE partner repository with the identifiers ProteomeXchange: PXD003818 for nuclear proteomics and ProteomeXchange: PXD004191 for nuclear phosphoproteomics.

### Annotation of Protein Localization

We used Uniprot to annotate protein localization, i.e., nuclear, shuttling, cytoplasmic, or cytoskeleton, for nuclear and total extracts. In addition, localization of 522 rhythmic proteins in nuclear extract (Table S2) was manually corrected or added according to the literature if protein localization in Uniprot was missing.

### Rhythmicity Analysis for Nuclear Proteins and Phosphoproteins

Rhythmicity in temporal nuclear accumulation of proteins and phosphoproteins used harmonic regression, as described previously (Mauvoisin et al., 2014). To test whether rhythm of nuclear proteins in wild-type persists in *Cry1/2* DKO mice, we applied linear regressions combined with model selection, similar to Atger et al. (2015) (details in the Supplemental Experimental Procedures).

### Identification of Rhythmic Protein Complexes with SVD

To identify protein complexes showing diurnal accumulation in the nucleus, we applied SVD to the matrix  $E_{gt}$ , in which each row represents the standardized temporal profile of each subunit belonging to the same protein complex (details in the Supplemental Experimental Procedures).

### Inference of Rhythmic Motif Activity of TFs with DNase Hypersensitive Sites and Pre-mRNAs

We defined a non-redundant motif library and inferred rhythmic motif activity of TFs (details in the Supplemental Experimental Procedures).

### Inference of Kinases with Rhythmic Activities

We used phase enrichment analysis and linear model with regularization to infer kinases with rhythmic activities (details in the Supplemental Experimental Procedures).

### Immunofluorescence and Confocal Microscopy

Purified nuclei were fixed using PFA 2% in PBS and seeded onto glass coverslips coated with poly-L-ornithine. Fixed nuclei were washed with PBS and permeabilized with Eth-OH / Met-OH for 5 min. After washing with PBS, nuclei were incubated with LAMIN A/C and ACACA, FASN, NUP98 or ALB (antibodies in PBS 1% Horse Serum (HS) for 1 hr at RT. Nuclei were rinsed with PBS followed by incubation with Alexa Fluor 488 and 555 coupled secondary antibodies in PBS 1% HS containing Hoechst (Life technologies) for 1 hr at RT. They were imaged using Leica TCS SP8 confocal microscope after a final PBS rinsing with images collected at 63x magnification. References for the antibodies are given in Table S7, related to Experimental Procedures.

### FACS Analysis

Fluorescence-activated cell sorting (FACS) analysis of purified nuclei is detailed in the Supplemental Experimental Procedures.

### Immunohistochemistry Experiment

Immunohistochemistry (IHC) analysis of mouse liver is detailed in the Supplemental Experimental Procedures.

### IHC Image Segmentation and Estimation of Different Polyploid Cell Populations

Whole IHC images were automatically segmented and nuclear areas, as proxies of DNA contents, were estimated. It allowed us to estimate fractions of all different polyploid cell populations (details in the Supplemental Experimental Procedures).

### ACCESSION NUMBERS

Raw MS data and search engine outputs have been deposited in the ProteomeXchange Consortium under ID codes ProteomeXchange: PXD003818 (nuclear proteomics) and PXD004191 (nuclear phosphoproteomics).

### SUPPLEMENTAL INFORMATION

Supplemental Information includes Supplemental Experimental Procedures, seven figures, and seven tables and can be found with this article online at <http://dx.doi.org/10.1016/j.cmet.2016.10.003>.

### AUTHOR CONTRIBUTIONS

Conceptualization, J.W., D.M., F.N., and F.G.; Formal Analysis, J.W. and F.N.; Investigation, D.M., E.M., F.A., A.N.G., L.D., F.S., A.P., M.K., P.W., and M.Q.; Visualization, J.W. and D.M.; Writing – Original Draft, J.W., D.M., V.D., F.N., and F.G.; Writing – Review & Editing, all authors; Supervision, F.N. and F.G.; Funding Acquisition, F.N. and F.G.

### ACKNOWLEDGMENTS

This research was supported by the Swiss National Science Foundation (through individual research grant 31003A-153340 to F.N.), the Ecole Polytechnique Fédérale de Lausanne (EPFL), the European Research Council (through individual starting grants ERC-2010-StG-260988 to F.G. and ERC-2010-StG-260667 to F.N.), and the Leenaards Foundation (to F.G. and F.N.). We thank Laura Symul for her help on figure artwork. We thank Jessica Sordet-Dessimoz at the Histology Core Facility, EPFL, for the assistance in IHC. D.M., E.M., F.A., A.N.G., L.D., F.S., A.P., M.K., and F.G. are employees of Nestlé Institute of Health Sciences S.A.

Received: May 27, 2016

Revised: July 25, 2016

Accepted: October 5, 2016

Published: November 3, 2016

## REFERENCES

- Andersen, J.S., Wilkinson, C.J., Mayor, T., Mortensen, P., Nigg, E.A., and Mann, M. (2003). Proteomic characterization of the human centrosome by protein correlation profiling. *Nature* **426**, 570–574.
- Andersen, J.S., Lam, Y.W., Leung, A.K.L., Ong, S.-E., Lyon, C.E., Lamond, A.I., and Mann, M. (2005). Nucleolar proteome dynamics. *Nature* **433**, 77–83.
- Asher, G., and Sassone-Corsi, P. (2015). Time for food: the intimate interplay between nutrition, metabolism, and the circadian clock. *Cell* **161**, 84–92.
- Atger, F., Gobet, C., Marquis, J., Martin, E., Wang, J., Weger, B., Lefebvre, G., Descombes, P., Naef, F., and Gachon, F. (2015). Circadian and feeding rhythms differentially affect rhythmic mRNA transcription and translation in mouse liver. *Proc. Natl. Acad. Sci. USA* **112**, E6579–E6588.
- Balwierz, P.J., Pachkov, M., Arnold, P., Gruber, A.J., Zavolan, M., and van Nimwegen, E. (2014). ISMARA: automated modeling of genomic signals as a democracy of regulatory motifs. *Genome Res.* **24**, 869–884.
- Baquet, A., Hue, L., Meijer, A.J., van Woerkom, G.M., and Plomp, P.J. (1990). Swelling of rat hepatocytes stimulates glycogen synthesis. *J. Biol. Chem.* **265**, 955–959.
- Barbárasá, C. (1976). Rhythmic circadian activity of the rat hepatic lobule reflected at cellular level. *Morphol. Embryol. (Bucur.)* **22**, 33–39.
- Barbason, H.R. (1970). [Influence of the rhythm of circadian activity on mitotic index during hepatic regeneration]. *C. R. Acad. Sci. Hebd. Seances Acad. Sci. D* **270**, 3295–3298.
- Barnum, C.P., Jardetzky, C.D., and Halberg, F. (1958). Time relations among metabolic and morphologic 24-hour changes in mouse liver. *Am. J. Physiol.* **195**, 301–310.
- Bauer, D.C., Willadsen, K., Buske, F.A., Lê Cao, K.-A., Bailey, T.L., Dellaire, G., and Bodén, M. (2011). Sorting the nuclear proteome. *Bioinformatics* **27**, i7–i14.
- Bieler, J., Cannavo, R., Gustafson, K., Gobet, C., Gatfield, D., and Naef, F. (2014). Robust synchronization of coupled circadian and cell cycle oscillators in single mammalian cells. *Mol. Syst. Biol.* **10**, 739.
- Binder, J.X., Pletscher-Frankild, S., Tsafou, K., Stolte, C., O'Donoghue, S.I., Schneider, R., and Jensen, L.J. (2014). COMPARTMENTS: unification and visualization of protein subcellular localization evidence. *Database (Oxford)* **2014**, bau012.
- Bozek, K., Relógio, A., Kielbasa, S.M., Heine, M., Dame, C., Kramer, A., and Herzog, H. (2009). Regulation of clock-controlled genes in mammals. *PLoS ONE* **4**, e4882.
- Bucher, O., and Suppan, P. (1967). Amitose et fusion nucléaires au cours du rythme circadien. In *The Cellular Aspects of Biorhythms*, H. von Mayersbach, ed. (Springer Berlin Heidelberg), pp. 124–132.
- Bur, I.M., Cohen-Solal, A.M., Carmignac, D., Abecassis, P.-Y., Chauvet, N., Martin, A.O., van der Horst, G.T.J., Robinson, I.C.A.F., Maurel, P., Mollard, P., and Bonnefont, X. (2009). The circadian clock components CRY1 and CRY2 are necessary to sustain sex dimorphism in mouse liver metabolism. *J. Biol. Chem.* **284**, 9066–9073.
- Chauhan, S., Goodwin, J.G., Chauhan, S., Manyam, G., Wang, J., Kamat, A.M., and Boyd, D.D. (2013). ZKSCAN3 is a master transcriptional repressor of autophagy. *Mol. Cell* **50**, 16–28.
- Chen, W.-D., Wen, M.-S., Shie, S.-S., Lo, Y.-L., Wo, H.-T., Wang, C.-C., Hsieh, I.C., Lee, T.-H., and Wang, C.-Y. (2014). The circadian rhythm controls telomeres and telomerase activity. *Biochem. Biophys. Res. Commun.* **451**, 408–414.
- Chen, X., Shi, S.-P., Suo, S.-B., Xu, H.-D., and Qiu, J.-D. (2015). Proteomic analysis and prediction of human phosphorylation sites in subcellular level reveal subcellular specificity. *Bioinformatics* **31**, 194–200.
- Chiang, C.-K., Mehta, N., Patel, A., Zhang, P., Ning, Z., Mayne, J., Sun, W.Y.L., Cheng, H.-Y.M., and Figeys, D. (2014). The proteomic landscape of the suprachiasmatic nucleus clock reveals large-scale coordination of key biological processes. *PLoS Genet.* **10**, e1004695.
- Ciccica, A., and Elledge, S.J. (2010). The DNA damage response: making it safe to play with knives. *Mol. Cell* **40**, 179–204.
- Costa, A., Hood, I.V., and Berger, J.M. (2013). Mechanisms for initiating cellular DNA replication. *Annu. Rev. Biochem.* **82**, 25–54.
- Crane, B.R., and Young, M.W. (2014). Interactive features of proteins composing eukaryotic circadian clocks. *Annu. Rev. Biochem.* **83**, 191–219.
- Cronshaw, J.M., Krutchinsky, A.N., Zhang, W., Chait, B.T., and Matunis, M.J. (2002). Proteomic analysis of the mammalian nuclear pore complex. *J. Cell Biol.* **158**, 915–927.
- Dammer, E.B., Duong, D.M., Diner, I., Gearing, M., Feng, Y., Lah, J.J., Levey, A.I., and Seyfried, N.T. (2013). Neuron enriched nuclear proteome isolated from human brain. *J. Proteome Res.* **12**, 3193–3206.
- de la Cruz, J., Karbstein, K., and Woolford, J.L., Jr. (2015). Functions of ribosomal proteins in assembly of eukaryotic ribosomes in vivo. *Annu. Rev. Biochem.* **84**, 93–129.
- Denais, C.M., Gilbert, R.M., Isermann, P., McGregor, A.L., te Lindert, M., Weigel, B., Davidson, P.M., Friedl, P., Wolf, K., and Lammerding, J. (2016). Nuclear envelope rupture and repair during cancer cell migration. *Science* **352**, 353–358.
- Doherty, C.J., and Kay, S.A. (2010). Circadian control of global gene expression patterns. *Annu. Rev. Genet.* **44**, 419–444.
- Echave Llanos, J.M., de Vaccaro, M.E.E., and Surur, J.M. (1970). 24-hour variations in DNA of the liver in young and adult male mice. *J. Interdiscipl. Cycle Res.* **1**, 161–171.
- Echave Llanos, J.M., Aloisio, M.D., Souto, M., Balduzzi, R., and Surur, J.M. (1971). Circadian variations of DNA synthesis, mitotic activity, and cell size of hepatocyte population in young immature male mouse growing liver. *Virchows Arch. B Cell Pathol. Incl. Mol. Pathol.* **8**, 309–317.
- Etienne-Manneville, S. (2013). Microtubules in cell migration. *Annu. Rev. Cell Dev. Biol.* **29**, 471–499.
- Fang, B., Everett, L.J., Jager, J., Briggs, E., Armour, S.M., Feng, D., Roy, A., Gerhart-Hines, Z., Sun, Z., and Lazar, M.A. (2014). Circadian enhancers coordinate multiple phases of rhythmic gene transcription in vivo. *Cell* **159**, 1140–1152.
- Feillet, C., Krusche, P., Tamanini, F., Janssens, R.C., Downey, M.J., Martin, P., Teboul, M., Saito, S., Lévi, F.A., Bretschneider, T., et al. (2014). Phase locking and multiple oscillating attractors for the coupled mammalian clock and cell cycle. *Proc. Natl. Acad. Sci. USA* **111**, 9828–9833.
- Fink, J.L., Karunarathne, S., Mittal, A., Gardiner, D.M., Hamilton, N., Mahony, D., Kai, C., Suzuki, H., Hayashizaki, Y., and Teasdale, R.D. (2008). Towards defining the nuclear proteome. *Genome Biol.* **9**, R15.
- Foster, L.J., de Hoog, C.L., Zhang, Y., Zhang, Y., Xie, X., Mootha, V.K., and Mann, M. (2006). A mammalian organelle map by protein correlation profiling. *Cell* **125**, 187–199.
- Franklin, S., Zhang, M.J., Chen, H., Paulsson, A.K., Mitchell-Jordan, S.A., Li, Y., Ping, P., and Vondriska, T.M. (2011). Specialized compartments of cardiac nuclei exhibit distinct proteomic anatomy. *Mol. Cell. Proteomics* **10**, 000703.
- Fu, L., Pelicano, H., Liu, J., Huang, P., and Lee, C. (2002). The circadian gene *Period2* plays an important role in tumor suppression and DNA damage response in vivo. *Cell* **111**, 41–50.
- Gachon, F. (2007). Physiological function of PARBZip circadian clock-controlled transcription factors. *Ann. Med.* **39**, 562–571.
- Gachon, F., Nagoshi, E., Brown, S.A., Ripperger, J., and Schibler, U. (2004). The mammalian circadian timing system: from gene expression to physiology. *Chromosoma* **113**, 103–112.
- Gaidatzis, D., Burger, L., and Stadler, M.B. (2015). Analysis of intronic and exonic reads in RNA-seq data characterizes transcriptional and post-transcriptional regulation. *Nat. Biotechnol.* **33**, 722–729.
- Geiger, T., Velic, A., Macek, B., Lundberg, E., Kampf, C., Nagaraj, N., Uhlen, M., Cox, J., and Mann, M. (2013). Initial quantitative proteomic map of 28 mouse tissues using the SILAC mouse. *Mol. Cell. Proteomics* **12**, 1709–1722.
- Gentric, G., and Desdouets, C. (2014). Polyploidization in liver tissue. *Am. J. Pathol.* **184**, 322–331.

- Gerber, A., Esnault, C., Aubert, G., Treisman, R., Pralong, F., and Schibler, U. (2013). Blood-borne circadian signal stimulates daily oscillations in actin dynamics and SRF activity. *Cell* 152, 492–503.
- Gerhart-Hines, Z., and Lazar, M.A. (2015). Circadian metabolism in the light of evolution. *Endocr. Rev.* 36, 289–304.
- Gilardi, F., Migliavacca, E., Naldi, A., Baruchet, M., Canella, D., Le Martelot, G., Guex, N., and Desvergne, B.; CyclIX Consortium (2014). Genome-wide analysis of SREBP1 activity around the clock reveals its combined dependency on nutrient and circadian signals. *PLoS Genet.* 10, e1004155.
- Gougelet, A., Torre, C., Veber, P., Sartor, C., Bachelot, L., Denechaud, P.-D., Godard, C., Moldes, M., Burnol, A.-F., Dubuquoy, C., et al. (2014). T-cell factor 4 and  $\beta$ -catenin chromatin occupancies pattern zonal liver metabolism in mice. *Hepatology* 59, 2344–2357.
- Hendzel, M.J., Wei, Y., Mancini, M.A., Van Hooser, A., Ranalli, T., Brinkley, B.R., Bazett-Jones, D.P., and Allis, C.D. (1997). Mitosis-specific phosphorylation of histone H3 initiates primarily within pericentromeric heterochromatin during G2 and spreads in an ordered fashion coincident with mitotic chromosome condensation. *Chromosoma* 106, 348–360.
- Heng, Y.-W., and Koh, C.-G. (2010). Actin cytoskeleton dynamics and the cell division cycle. *Int. J. Biochem. Cell Biol.* 42, 1622–1633.
- Hu, J., Rho, H.-S., Newman, R.H., Zhang, J., Zhu, H., and Qian, J. (2014). PhosphoNetworks: a database for human phosphorylation networks. *Bioinformatics* 30, 141–142.
- Humphrey, S.J., Azimifar, S.B., and Mann, M. (2015). High-throughput phosphoproteomics reveals in vivo insulin signaling dynamics. *Nat. Biotechnol.* 33, 990–995.
- Huttlin, E.L., Jedrychowski, M.P., Elias, J.E., Goswami, T., Rad, R., Beausoleil, S.A., Villén, J., Haas, W., Sowa, M.E., and Gygi, S.P. (2010). A tissue-specific atlas of mouse protein phosphorylation and expression. *Cell* 143, 1174–1189.
- Jiao, W., Datta, J., Lin, H.-M., Dunder, M., and Rane, S.G. (2006). Nucleocytoplasmic shuttling of the retinoblastoma tumor suppressor protein via Cdk phosphorylation-dependent nuclear export. *J. Biol. Chem.* 281, 38098–38108.
- Jouffe, C., Cretenet, G., Symul, L., Martin, E., Atger, F., Naef, F., and Gachon, F. (2013). The circadian clock coordinates ribosome biogenesis. *PLoS Biol.* 11, e1001455.
- Kang, T.-H., Reardon, J.T., Kemp, M., and Sancar, A. (2009). Circadian oscillation of nucleotide excision repair in mammalian brain. *Proc. Natl. Acad. Sci. USA* 106, 2864–2867.
- Kang, T.-H., Lindsey-Boltz, L.A., Reardon, J.T., and Sancar, A. (2010). Circadian control of XPA and excision repair of cisplatin-DNA damage by cryptochrome and HERC2 ubiquitin ligase. *Proc. Natl. Acad. Sci. USA* 107, 4890–4895.
- Kim, M.-S., Pinto, S.M., Getnet, D., Nirujogi, R.S., Manda, S.S., Chaerkady, R., Madugundu, A.K., Kelkar, D.S., Isserlin, R., Jain, S., et al. (2014). A draft map of the human proteome. *Nature* 509, 575–581.
- Kislinger, T., Cox, B., Kannan, A., Chung, C., Hu, P., Ignatchenko, A., Scott, M.S., Gramolini, A.O., Morris, Q., Hallett, M.T., et al. (2006). Global survey of organ and organelle protein expression in mouse: combined proteomic and transcriptomic profiling. *Cell* 125, 173–186.
- Koike, N., Yoo, S.-H., Huang, H.-C., Kumar, V., Lee, C., Kim, T.-K., and Takahashi, J.S. (2012). Transcriptional architecture and chromatin landscape of the core circadian clock in mammals. *Science* 338, 349–354.
- Krüger, M., Moser, M., Ussar, S., Thievensen, I., Luber, C.A., Forner, F., Schmidt, S., Zanivan, S., Fässler, R., and Mann, M. (2008). SILAC mouse for quantitative proteomics uncovers kindlin-3 as an essential factor for red blood cell function. *Cell* 134, 353–364.
- Lamia, K.A., Sachdeva, U.M., DiTacchio, L., Williams, E.C., Alvarez, J.G., Egan, D.F., Vasquez, D.S., Juguilon, H., Panda, S., Shaw, R.J., et al. (2009). AMPK regulates the circadian clock by cryptochrome phosphorylation and degradation. *Science* 326, 437–440.
- Lang, F., Busch, G.L., Ritter, M., Völkl, H., Waldegger, S., Gulbins, E., and Häussinger, D. (1998). Functional significance of cell volume regulatory mechanisms. *Physiol. Rev.* 78, 247–306.
- Lapik, Y.R., Fernandes, C.J., Lau, L.F., and Pestov, D.G. (2004). Physical and functional interaction between Pes1 and Bop1 in mammalian ribosome biogenesis. *Mol. Cell* 15, 17–29.
- Le Martelot, G., Canella, D., Symul, L., Migliavacca, E., Gilardi, F., Liechti, R., Martin, O., Harshman, K., Delorenzi, M., Desvergne, B., et al.; CyclIX Consortium (2012). Genome-wide RNA polymerase II profiles and RNA accumulation reveal kinetics of transcription and associated epigenetic changes during diurnal cycles. *PLoS Biol.* 10, e1001442.
- Leveille, G.A., and Chakrabarty, K. (1967). Diurnal variations in tissue glycogen and liver weight of meal-fed rats. *J. Nutr.* 93, 546–554.
- Li, M., and Zhang, P. (2009). The function of APC/C<sup>Cdh1</sup> in cell cycle and beyond. *Cell Div.* 4, 2.
- Lundby, A., Secher, A., Lage, K., Nordsborg, N.B., Dmytriiev, A., Lundby, C., and Olsen, J.V. (2012). Quantitative maps of protein phosphorylation sites across 14 different rat organs and tissues. *Nat. Commun.* 3, 876.
- Lykke-Andersen, S., Brodersen, D.E., and Jensen, T.H. (2009). Origins and activities of the eukaryotic exosome. *J. Cell Sci.* 122, 1487–1494.
- Ma, D., Panda, S., and Lin, J.D. (2011). Temporal orchestration of circadian autophagy rhythm by C/EBP $\beta$ . *EMBO J.* 30, 4642–4651.
- Magnaghi-Jaulin, L., Groisman, R., Naguibneva, I., Robin, P., Lorain, S., Le Villain, J.P., Troalen, F., Trouche, D., and Harel-Bellan, A. (1998). Retinoblastoma protein represses transcription by recruiting a histone deacetylase. *Nature* 391, 601–605.
- Mahajan, K., and Mahajan, N.P. (2013). WEE1 tyrosine kinase, a novel epigenetic modifier. *Trends Genet.* 29, 394–402.
- Maier, B., Wendt, S., Vanselow, J.T., Wallach, T., Reischl, S., Oehmke, S., Schlosser, A., and Kramer, A. (2009). A large-scale functional RNAi screen reveals a role for CK2 in the mammalian circadian clock. *Genes Dev.* 23, 708–718.
- Malhas, A., Goulbourne, C., and Vaux, D.J. (2011). The nucleoplasmic reticulum: form and function. *Trends Cell Biol.* 21, 362–373.
- Martin, N.C., McCullough, C.T., Bush, P.G., Sharp, L., Hall, A.C., and Harrison, D.J. (2002). Functional analysis of mouse hepatocytes differing in DNA content: volume, receptor expression, and effect of IFN $\gamma$ . *J. Cell. Physiol.* 191, 138–144.
- Martineau-Pivoteau, N., Cussac-Buchdahl, C., Chollet, P., Rolhion, C., Debiton, E., Rapp, M., Kwiatkowski, F., Madelmont, J.C., and Levi, F. (1996). Circadian variation in O<sup>6</sup>-methylguanine-DNA methyltransferase activity in mouse liver. *Anticancer Drugs* 7, 703–709.
- Matsuo, T., Yamaguchi, S., Mitsui, S., Emi, A., Shimoda, F., and Okamura, H. (2003). Control mechanism of the circadian clock for timing of cell division in vivo. *Science* 302, 255–259.
- Mauvoisin, D., Wang, J., Jouffe, C., Martin, E., Atger, F., Waridel, P., Quadroni, M., Gachon, F., and Naef, F. (2014). Circadian clock-dependent and -independent rhythmic proteomes implement distinct diurnal functions in mouse liver. *Proc. Natl. Acad. Sci. USA* 111, 167–172.
- McCann, K.L., Charette, J.M., Vincent, N.G., and Baserga, S.J. (2015). A protein interaction map of the LSU processome. *Genes Dev.* 29, 862–875.
- Melé, M., Ferreira, P.G., Reverter, F., DeLuca, D.S., Monlong, J., Sammeth, M., Young, T.R., Goldmann, J.M., Pervouchine, D.D., Sullivan, T.J., et al.; GTEx Consortium (2015). Human genomics. The human transcriptome across tissues and individuals. *Science* 348, 660–665.
- Miyaoka, Y., Ebato, K., Kato, H., Arakawa, S., Shimizu, S., and Miyajima, A. (2012). Hypertrophy and unconventional cell division of hepatocytes underlie liver regeneration. *Curr. Biol.* 22, 1166–1175.
- Mjelle, R., Hegre, S.A., Aas, P.A., Slupphaug, G., Drabløs, F., Saetrom, P., and Krokan, H.E. (2015). Cell cycle regulation of human DNA repair and chromatin remodeling genes. *DNA Repair (Amst.)* 30, 53–67.
- Neufeld-Cohen, A., Robles, M.S., Aviram, R., Manella, G., Adamovich, Y., Ladeuix, B., Nir, D., Rousso-Noori, L., Kuperman, Y., Golik, M., et al. (2016). Circadian control of oscillations in mitochondrial rate-limiting enzymes and nutrient utilization by PERIOD proteins. *Proc. Natl. Acad. Sci. USA* 113, E1673–E1682.



- Nissan, T.A., Bassler, J., Petfalski, E., Tollervey, D., and Hurt, E. (2002). 60S pre-ribosome formation viewed from assembly in the nucleolus until export to the cytoplasm. *EMBO J.* *21*, 5539–5547.
- Palombo, P., Moreno-Villanueva, M., and Mangerich, A. (2015). Day and night variations in the repair of ionizing-radiation-induced DNA damage in mouse splenocytes. *DNA Repair (Amst.)* *28*, 37–47.
- Phipps, K.R., Charette, J., and Baserga, S.J. (2011). The small subunit processes in ribosome biogenesis—progress and prospects. *Wiley Interdiscip. Rev. RNA* *2*, 1–21.
- Raab, M., Gentili, M., de Belly, H., Thiam, H.R., Vargas, P., Jimenez, A.J., Lautenschlaeger, F., Voituriez, R., Lennon-Duménil, A.M., Manel, N., and Piel, M. (2016). ESCRT III repairs nuclear envelope ruptures during cell migration to limit DNA damage and cell death. *Science* *352*, 359–362.
- Reinke, H., Saini, C., Fleury-Olela, F., Dibner, C., Benjamin, I.J., and Schibler, U. (2008). Differential display of DNA-binding proteins reveals heat-shock factor 1 as a circadian transcription factor. *Genes Dev.* *22*, 331–345.
- Reischl, S., and Kramer, A. (2011). Kinases and phosphatases in the mammalian circadian clock. *FEBS Lett.* *585*, 1393–1399.
- Ren, X., Bai, X., Zhang, X., Li, Z., Tang, L., Zhao, X., Li, Z., Ren, Y., Wei, S., Wang, Q., et al. (2015). Quantitative nuclear proteomics identifies that miR-137-mediated EZH2 reduction regulates resveratrol-induced apoptosis of neuroblastoma cells. *Mol. Cell. Proteomics* *14*, 316–328.
- Rey, G., Cesbron, F., Rougemont, J., Reinke, H., Brunner, M., and Naef, F. (2011). Genome-wide and phase-specific DNA-binding rhythms of BMAL1 control circadian output functions in mouse liver. *PLoS Biol.* *9*, e1000595.
- Robles, M.S., Cox, J., and Mann, M. (2014). In-vivo quantitative proteomics reveals a key contribution of post-transcriptional mechanisms to the circadian regulation of liver metabolism. *PLoS Genet.* *10*, e1004047.
- Rouyer, F., Rachidi, M., Pikielny, C., and Rosbash, M. (1997). A new gene encoding a putative transcription factor regulated by the *Drosophila* circadian clock. *EMBO J.* *16*, 3944–3954.
- Saitoh, N., Spahr, C.S., Patterson, S.D., Bubulya, P., Neuwald, A.F., and Spector, D.L. (2004). Proteomic analysis of interchromatin granule clusters. *Mol. Biol. Cell* *15*, 3876–3890.
- Schirmer, E.C., Florens, L., Guan, T., Yates, J.R., 3rd, and Gerace, L. (2003). Nuclear membrane proteins with potential disease links found by subtractive proteomics. *Science* *301*, 1380–1382.
- Schliess, F., and Häussinger, D. (2003). Cell volume and insulin signaling. *Int. Rev. Cytol.* *225*, 187–228.
- Settembre, C., De Cegli, R., Mansueto, G., Saha, P.K., Vetrini, F., Visvikis, O., Huynh, T., Carissimo, A., Palmer, D., Klisch, T.J., et al. (2013). TFEB controls cellular lipid metabolism through a starvation-induced autoregulatory loop. *Nat. Cell Biol.* *15*, 647–658.
- Souto, M., and Llanos, J.M. (1985). The circadian optimal time for hepatectomy in the study of liver regeneration. *Chronobiol. Int.* *2*, 169–175.
- Stoll, B., Gerok, W., Lang, F., and Häussinger, D. (1992). Liver cell volume and protein synthesis. *Biochem. J.* *287*, 217–222.
- Tamaru, T., Hirayama, J., Isojima, Y., Nagai, K., Norioka, S., Takamatsu, K., and Sassone-Corsi, P. (2009). CK2 $\alpha$  phosphorylates BMAL1 to regulate the mammalian clock. *Nat. Struct. Mol. Biol.* *16*, 446–448.
- Thapa, M., Bommakanti, A., Shamsuzzaman, M., Gregory, B., Samsel, L., Zengel, J.M., and Lindahl, L. (2013). Repressed synthesis of ribosomal proteins generates protein-specific cell cycle and morphological phenotypes. *Mol. Biol. Cell* *24*, 3620–3633.
- Theodoropoulos, P.A., Stourmaras, C., Stoll, B., Markogiannakis, E., Lang, F., Gravanis, A., and Häussinger, D. (1992). Hepatocyte swelling leads to rapid decrease of the G-/total actin ratio and increases actin mRNA levels. *FEBS Lett.* *311*, 241–245.
- Uchida, C., Miwa, S., Kitagawa, K., Hattori, T., Isobe, T., Otani, S., Oda, T., Sugimura, H., Kamijo, T., Ookawa, K., et al. (2005). Enhanced Mdm2 activity inhibits pRB function via ubiquitin-dependent degradation. *EMBO J.* *24*, 160–169.
- Uchiyama, Y., and Asari, A. (1984). A morphometric study of the variations in subcellular structures of rat hepatocytes during 24 hours. *Cell Tissue Res.* *236*, 305–315.
- UniProt Consortium (2015). UniProt: a hub for protein information. *Nucleic Acids Res.* *43*, D204–D212.
- van der Horst, G.T.J., Muijtjens, M., Kobayashi, K., Takano, R., Kanno, S., Takao, M., de Wit, J., Verkerk, A., Eker, A.P.M., van Leenen, D., et al. (1999). Mammalian Cry1 and Cry2 are essential for maintenance of circadian rhythms. *Nature* *398*, 627–630.
- Vermeulen, K., Van Bockstaele, D.R., and Berneman, Z.N. (2003). The cell cycle: a review of regulation, deregulation and therapeutic targets in cancer. *Cell Prolif.* *36*, 131–149.
- Vollmers, C., Schmitz, R.J., Nathanson, J., Yeo, G., Ecker, J.R., and Panda, S. (2012). Circadian oscillations of protein-coding and regulatory RNAs in a highly dynamic mammalian liver epigenome. *Cell Metab.* *16*, 833–845.
- Warner, J.R. (1999). The economics of ribosome biosynthesis in yeast. *Trends Biochem. Sci.* *24*, 437–440.
- Warnke, S., Kemmler, S., Hames, R.S., Tsai, H.-L., Hoffmann-Rohrer, U., Fry, A.M., and Hoffmann, I. (2004). Polo-like kinase-2 is required for centriole duplication in mammalian cells. *Curr. Biol.* *14*, 1200–1207.
- Zhang, Y., Fang, C., Bao, H., Fan, H., Shen, H., and Yang, P. (2013). Nuclear proteome profile of C57BL/6J mouse liver. *Sci. China Life Sci.* *56*, 513–523.

**Cell Metabolism, Volume 25**

## **Supplemental Information**

### **Nuclear Proteomics Uncovers Diurnal**

### **Regulatory Landscapes in Mouse Liver**

**Jingkui Wang, Daniel Mauvoisin, Eva Martin, Florian Atger, Antonio Núñez Galindo, Loïc Dayon, Federico Sizzano, Alessio Palini, Martin Kussmann, Patrice Waridel, Manfredo Quadroni, Vjekoslav Dulić, Felix Naef, and Frédéric Gachon**

# Supplemental Figures and Table Legends

## Supplemental Figures Legends

**Figure S1. Experimental design and quality control for SILAC-based quantitative nuclear proteomics, related to Fig 1**

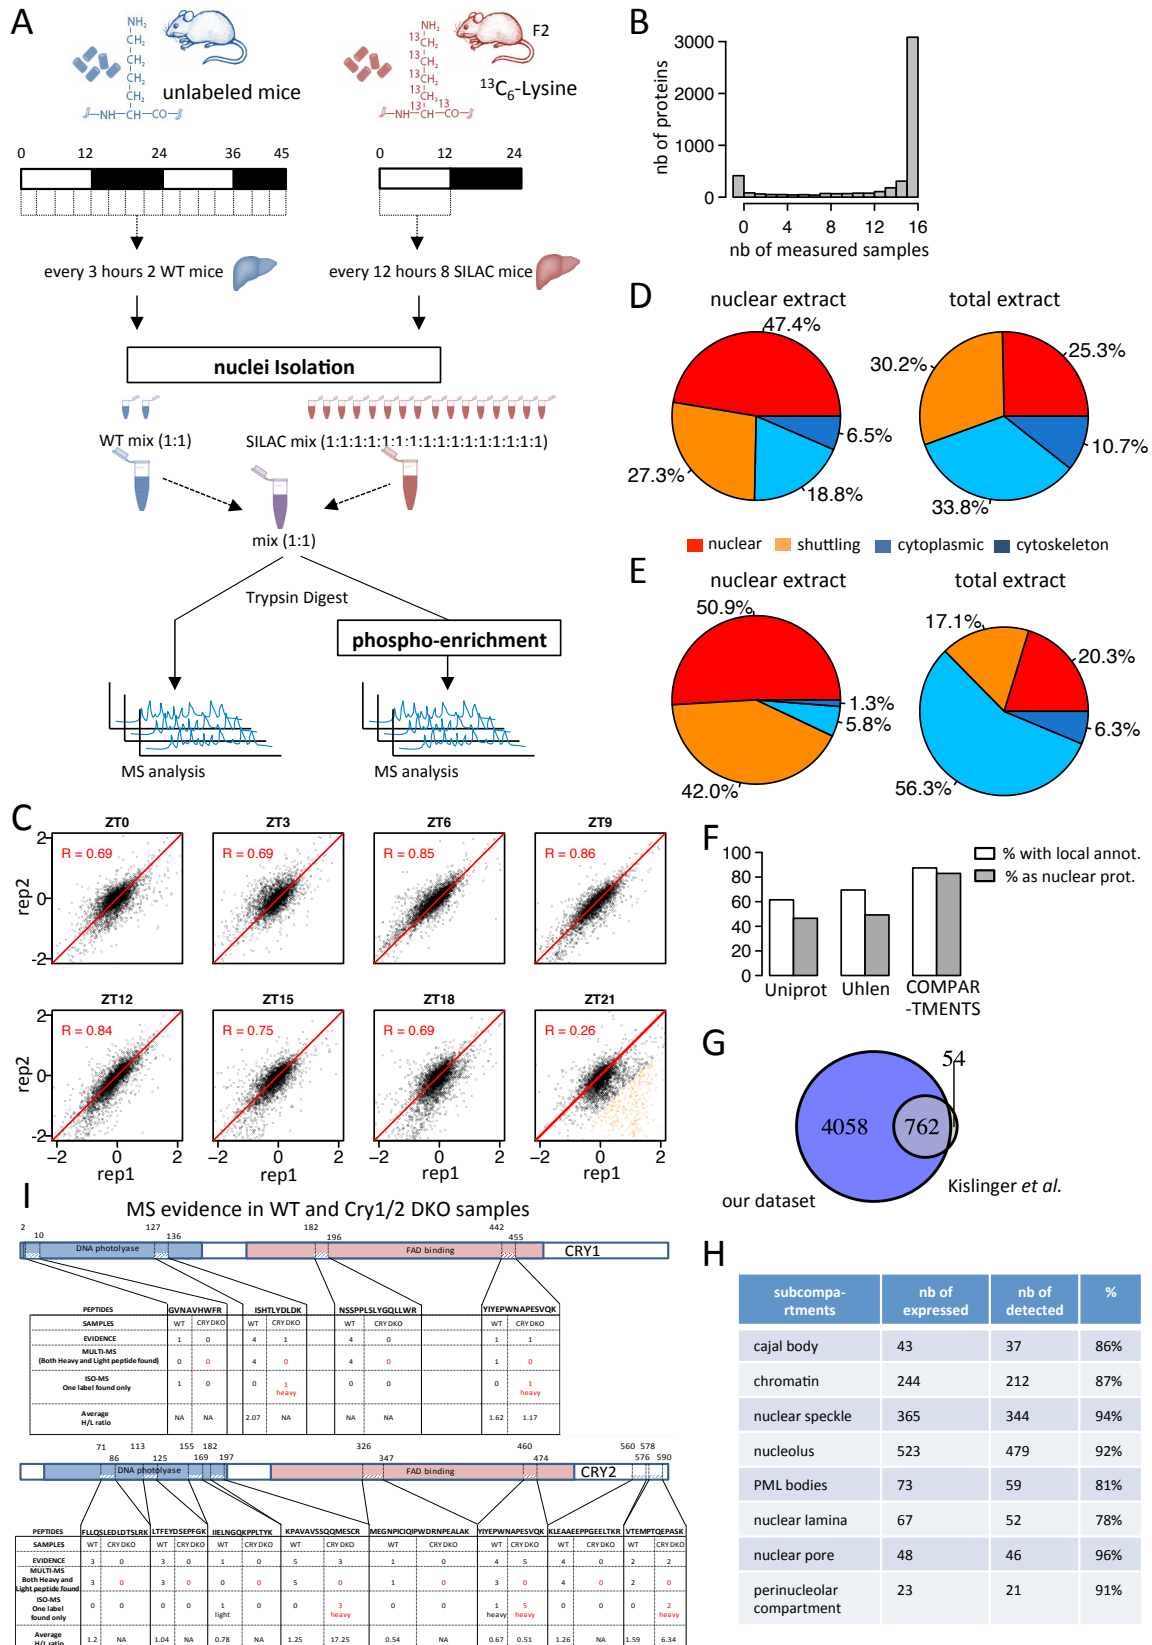

A. Workflow of the SILAC-based MS analysis for proteins and phosphoproteins extracted from purified mouse liver nuclei. Equal amounts of nuclear proteins extracted from two non-SILAC mice were pooled every 3 h during two consecutive days (WT mix). A reference SILAC nuclear protein mix was prepared from 8 SILAC mice collected at ZT0 and 8 collected at ZT12 (SILAC mix). Then, 16 mixes were obtained by adding the same amount of SILAC mix to the WT mix. As a result, the 16 mixes samples, 8 for day 1 and 8 for day 2 (or n=2 biological replicates at each of eight time points), were used for nuclear proteomics and nuclear phosphoproteomics.

B. Distribution of sample numbers quantified for 4820 detected nuclear proteins.

C. Pearson correlation analysis of biological replicates at the eight time points. All values are log<sub>2</sub> ratios to the common reference samples. The replicates are overall well correlated (70 % average Pearson correlation), and showing similar spread, indicating that the quality of the nuclear purifications was fairly homogenous. Only one time point (ZT21) showed a lower correlation. We could trace this back to a lower H/L ratio for 327 proteins in sample ZT21-Rep1 (orange dots). These proteins are mostly coming from peroxisomes, potentially due to a higher degree of carry-over from the cytoplasmic fraction in this sample.

D. Relative abundance of identified proteins annotated as nuclear, shuttling between cytoplasm and nucleus, cytoplasmic, and cytoskeleton (Uniprot) for nuclear extract and previously published total extract (Mauvoisin et al., 2014).

E. Same distribution as in C but for raw intensity signals quantified by MS.

F. Fraction of 4820 identified proteins with known localization and annotated as nuclear in Uniprot (The UniProt, 2015), Uhlén et al. (Uhlén et al., 2015), and COMPARTMENTS (Binder et al., 2014) datasets.

G. Comparison of mouse liver nuclear proteome identified in our dataset and the previous study (Kislinger et al., 2006) in which 762 out of 816 characterized nuclear proteins were overlapped by our analysis. This comparison is done using corresponding gene names.

H. Detection coverage of liver-expressed proteins in nuclear sub-compartments.

I. MS-evidence in protein mixes prepared with SILAC/WT and SILAC/*Cry1/2* DKO nuclear protein extracts shows CRY1 and CRY2 proteins identification only originates from the heavy part (WT protein extract) of the SILAC/*Cry1/2* DKO protein mixes (ISO-MS evidence only). The table shows sums of MS evidence for ZT0, 6, 12 and 18.

**Figure S2. Diurnal accumulation of nuclear proteins and confirmation of nuclear localization for individual examples by confocal microscopy, related to Fig 2**

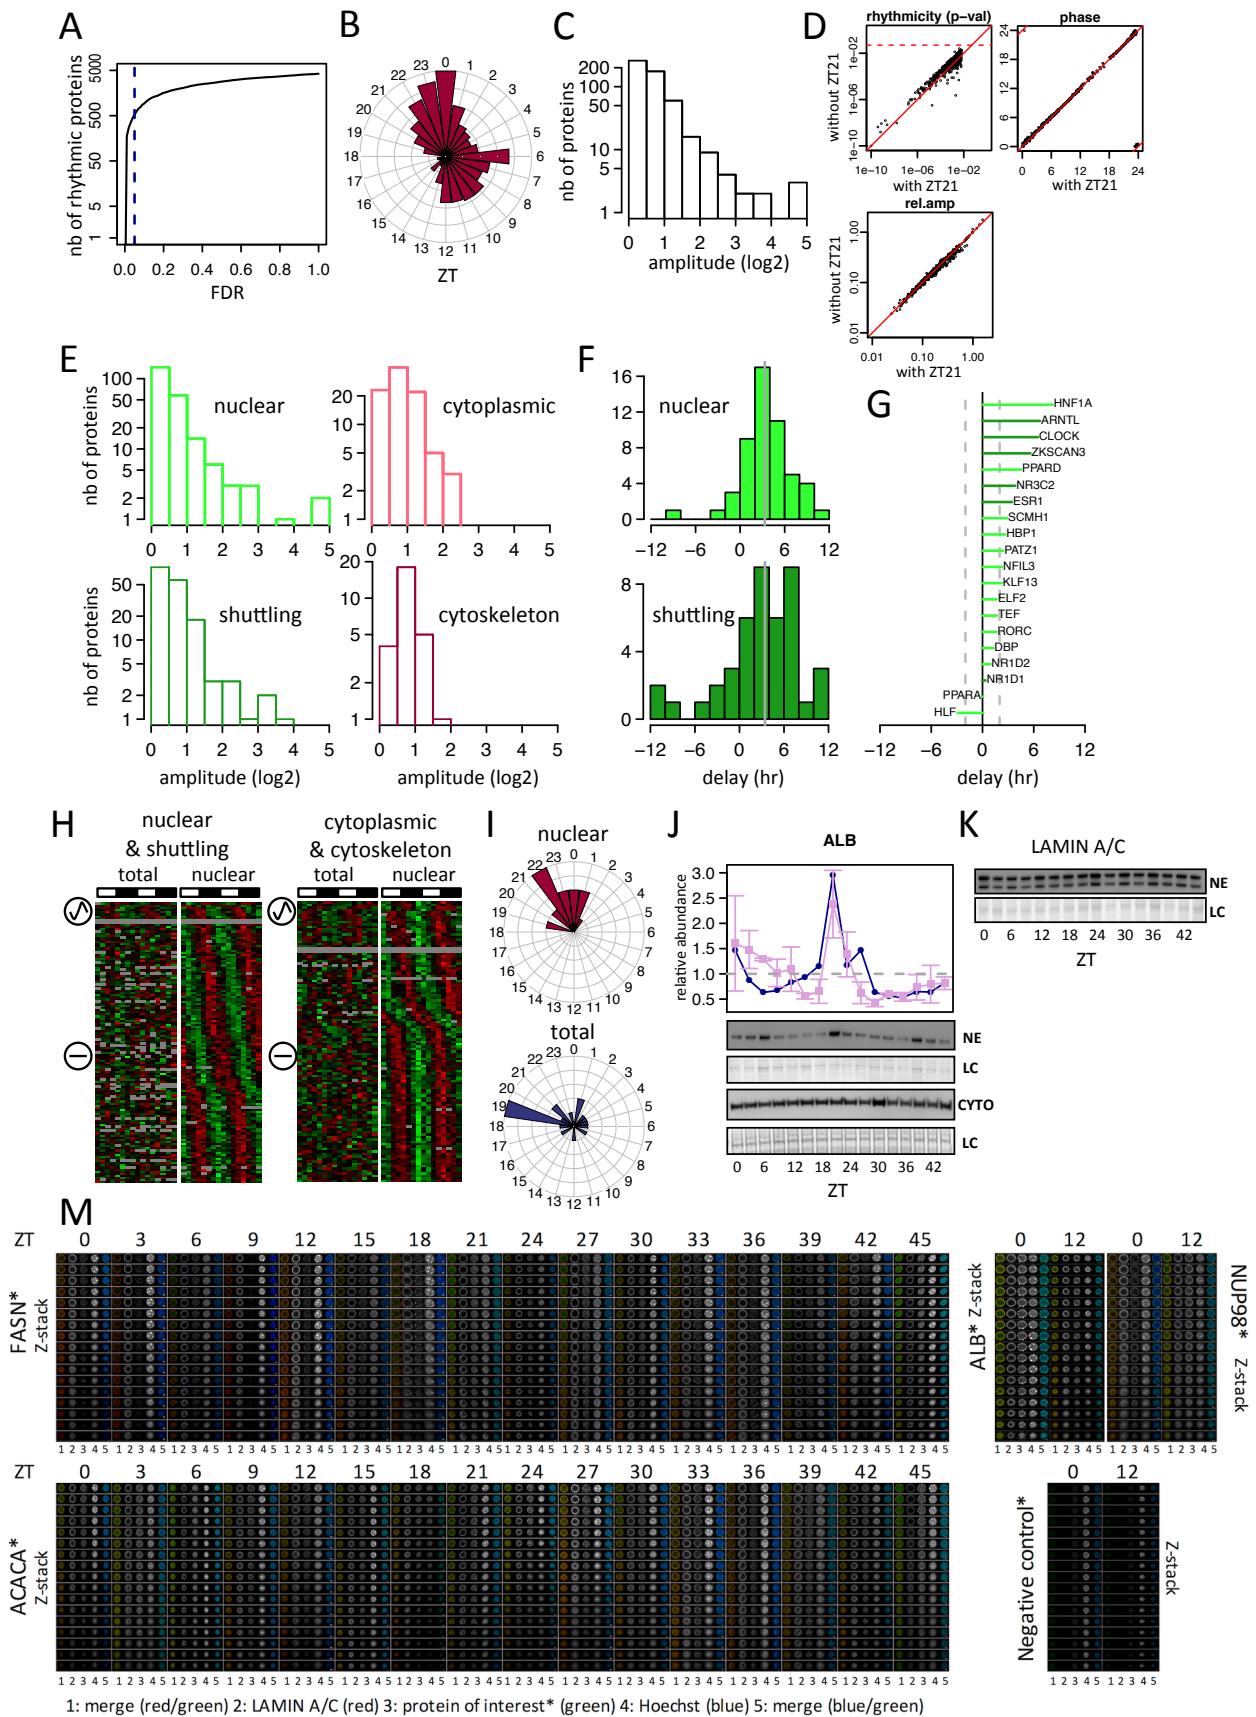

A. Dependency of the number of rhythmic nuclear proteins in the function of false discovery rate (FDR). With a value of  $FDR < 0.05$ , 522 rhythmic proteins are identified (blue dashed line).

B, C. Phase and peak-to-trough amplitude ( $\log_2$ ) distributions for rhythmic nuclear proteins ( $FDR < 0.05$ ).

D. The potential contamination of the ZT21 sample 1 only had a minor influence on the global rhythmic analysis. Indeed, the identical rhythmicity analysis without this sample presented very little differences on the identity of the rhythmic proteins as well as negligible differences on the estimated phases and amplitudes.

E. Peak-to-trough amplitude distributions of rhythmic proteins in C1 (nuclear and shuttling) and C2 (cytoplasmic and cytoskeleton groups).

F, G. Distribution of phase delay between nuclear protein and mRNA accumulation peaks for C1 (nuclear and shuttling groups). Specific delays are shown in (F) for TFs, which are enriched in the rhythmic nuclear proteins with corresponding rhythmic mRNAs ( $p < 10^{-5}$ ).

H. Heat maps comparing proteins with rhythmic accumulations in nuclear extracts ( $FDR < 0.05$ ) with corresponding proteins in total extracts (TE) (Mauvoisin et al., 2014) for both classes C1 (left panel) and C2 groups (right panel). Sinusoidal sign means rhythmic protein in TE, whereas straight line means constant protein in TE.

I. Phase distributions of C2 proteins in nuclear extracts (upper panel) compared with corresponding rhythmic proteins in total extracts (bottom panel).

J. Example of rhythmic nuclear proteins in C2 (ALB) confirmed by Western blot (WB) analysis in nuclear extracts (NE; upper blots) and cytoplasmic extracts (CYTO; lower blots). The two biological replicates are shown as ZT0-ZT21 (replica 1) and ZT24-ZT45 (replica 2). Quantifications of nuclear extracts by MS (blue lines) and WB (pink lines) are shown in the upper graphs. Data are normalized to the temporal mean and the sixteen time points show the mean and standard error (SEM) from two independent biological samples. Naphtol blue black staining of the membranes was used as a loading control (LC) and serves as references for normalisation of the quantified values.

K. LAMINA/C display flat nuclear accumulation measured by WB.

L. Nuclear detection of rhythmic proteins in C2 (FASN, ACACA and ALB) using confocal microscopy. Secondary antibodies alone were used as negative control and the nuclear pore complex NUP98 as positive control. Nuclei were stained and confocal z-stack images were acquired at 0.20  $\mu\text{m}$  intervals. Each image from top to bottom represents a z-stack from the center to the periphery of a nucleus. Horizontal white scale bars represent 1  $\mu\text{m}$ .

**Figure S3. Identification of rhythmic nuclear protein complexes by singular value decomposition (SVD), related to Fig 3**

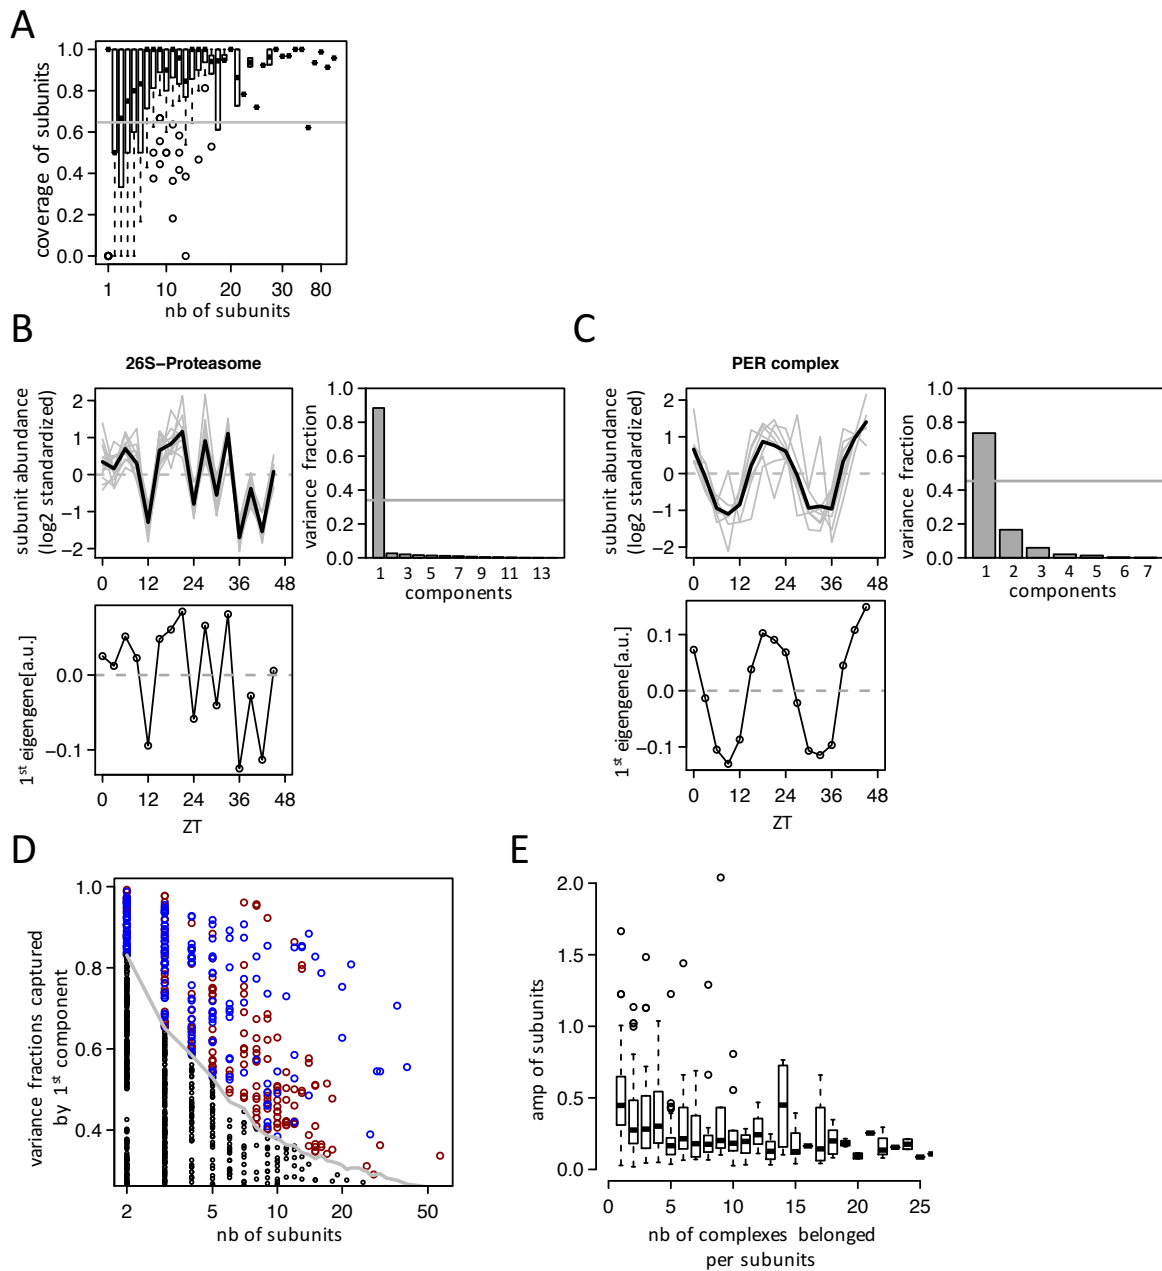

A. Fraction of subunits detected (coverage) in the function of the number of subunits among annotated nuclear protein complexes. Gray line indicates the coverage of proteins not annotated in complexes.

B, C. Temporal accumulation profiles and SVD analysis for two examples of nuclear protein complexes: 26S-proteasome (B) and PER complex (C). SVD analysis is applied to the matrix, in which rows represent standardized temporal profiles of all detected subunits within the complex across time points (upper left panel), and the fraction of variance captured by the first component of SVD is tested to be significantly different from the background (upper right panel). The background distribution is calculated by randomly choosing detected nuclear proteins not annotated in the database of complexes and generating complexes of the same number of subunits. The solid gray lines represent the threshold p-value of 0.05. When the first component capture a significant portion of variance, the rhythmicity and phase is assessed on the first eigengene (bottom left panels).

D. Variance fractions captured by the 1<sup>st</sup> component of SVD for all detected protein complexes. The solid gray line is the threshold of background with p-value = 0.05. Rhythmic nuclear protein complexes are indicated by red cycles and non-rhythmic ones by blue cycles.

E. Peak-to-trough amplitudes (log<sub>2</sub>) of subunits show a damping trend with number of complexes they belong.

**Figure S4. Diurnal rhythms of nuclear proteins involved in ribosome biogenesis and DNA repair, related to Fig 4**

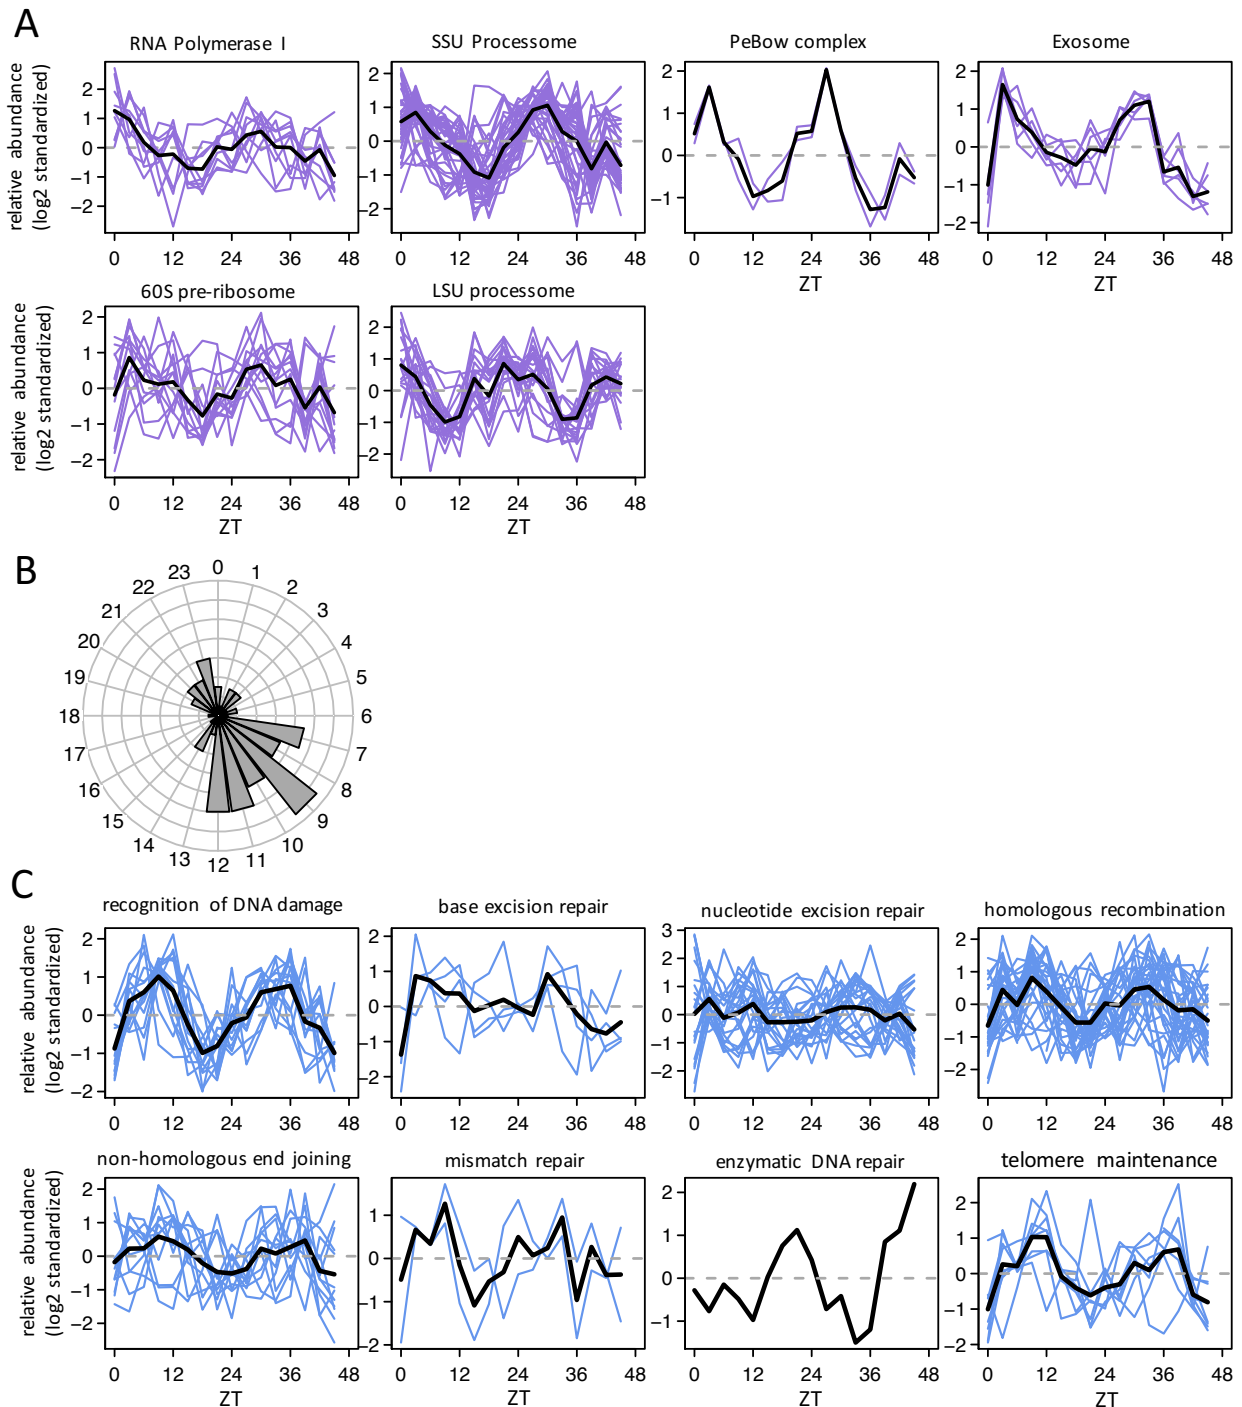

A. Rhythmic accumulation profiles of nuclear proteins involved in ribosome biogenesis, namely RNA polymerase I, SSU processome, PeBow complex, Exosome, 60 pre-ribosome, and LSU processome.

B. Peak time distribution of rhythmic nuclear proteins involved in DNA repair processes.

C. Temporal profiles of rhythmic nuclear proteins involved in recognition of DNA damage, base excision repair, nucleotide excision repair, homologous recombination, non-homologous end joining, mismatch repair, enzymatic DNA repair, and telomere maintenance.



**Figure S5. Nuclear phosphoproteome and its relationship with the nuclear proteome, related to Fig 5**

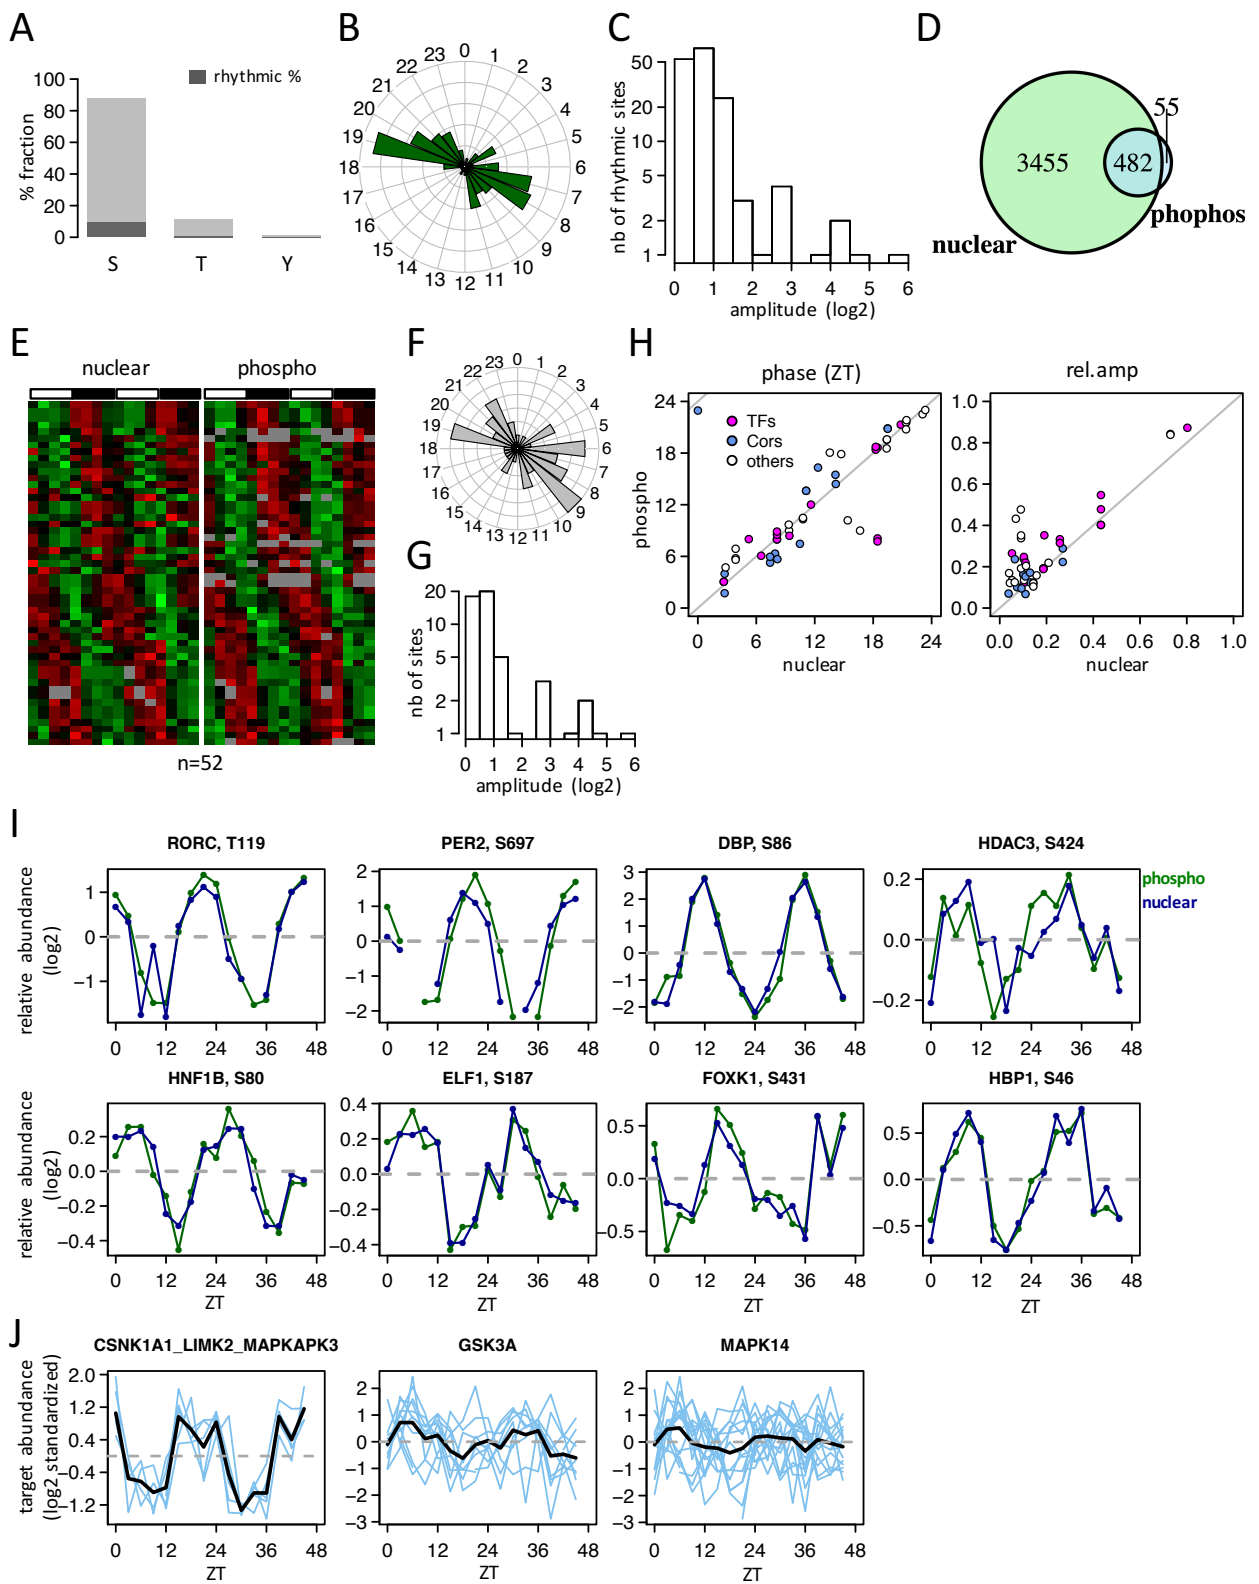

- A. Proportions of nuclear phosphorylation sites, Serine (S), Threonine (T) and Tyrosine (Y) quantified in at least 8 out of 16 samples, as well as fractions of sites showing diurnal accumulations (FDR < 0.05).
- B, C. Phase and peak-to-trough amplitude distributions for all rhythmic nuclear phosphosites.
- D. 482 proteins (corresponding to 859 phosphosites) of 537 proteins (corresponding to 980 phosphosites) with detected phosphorylation sites have corresponding proteins in the nuclear protein dataset.
- E. Heat maps representation of rhythmic phosphorylated sites (n = 52, right panel) with rhythmic nuclear proteins (left panel).
- F, G. Peak time and peak-to-trough amplitude distributions for the rhythmic nuclear phosphoproteins with rhythmic nuclear proteins in (E).
- H. Peak time and relative amplitude comparison between the nuclear phosphoproteins and corresponding nuclear proteins from (E).
- I. Temporal accumulation of individual examples from (E) (Blue line: nuclear proteins; Green line: nuclear phosphoproteins). Data are normalized to the temporal mean.
- J. Temporal accumulation of individual phosphorylated sites targeted by kinases CSK1A1, GSK3A, and MAPK14.

**Figure S6. Analysis of transcriptional and epigenetic regulation related to detected rhythmic TFs and co-regulators, related to Fig 6**

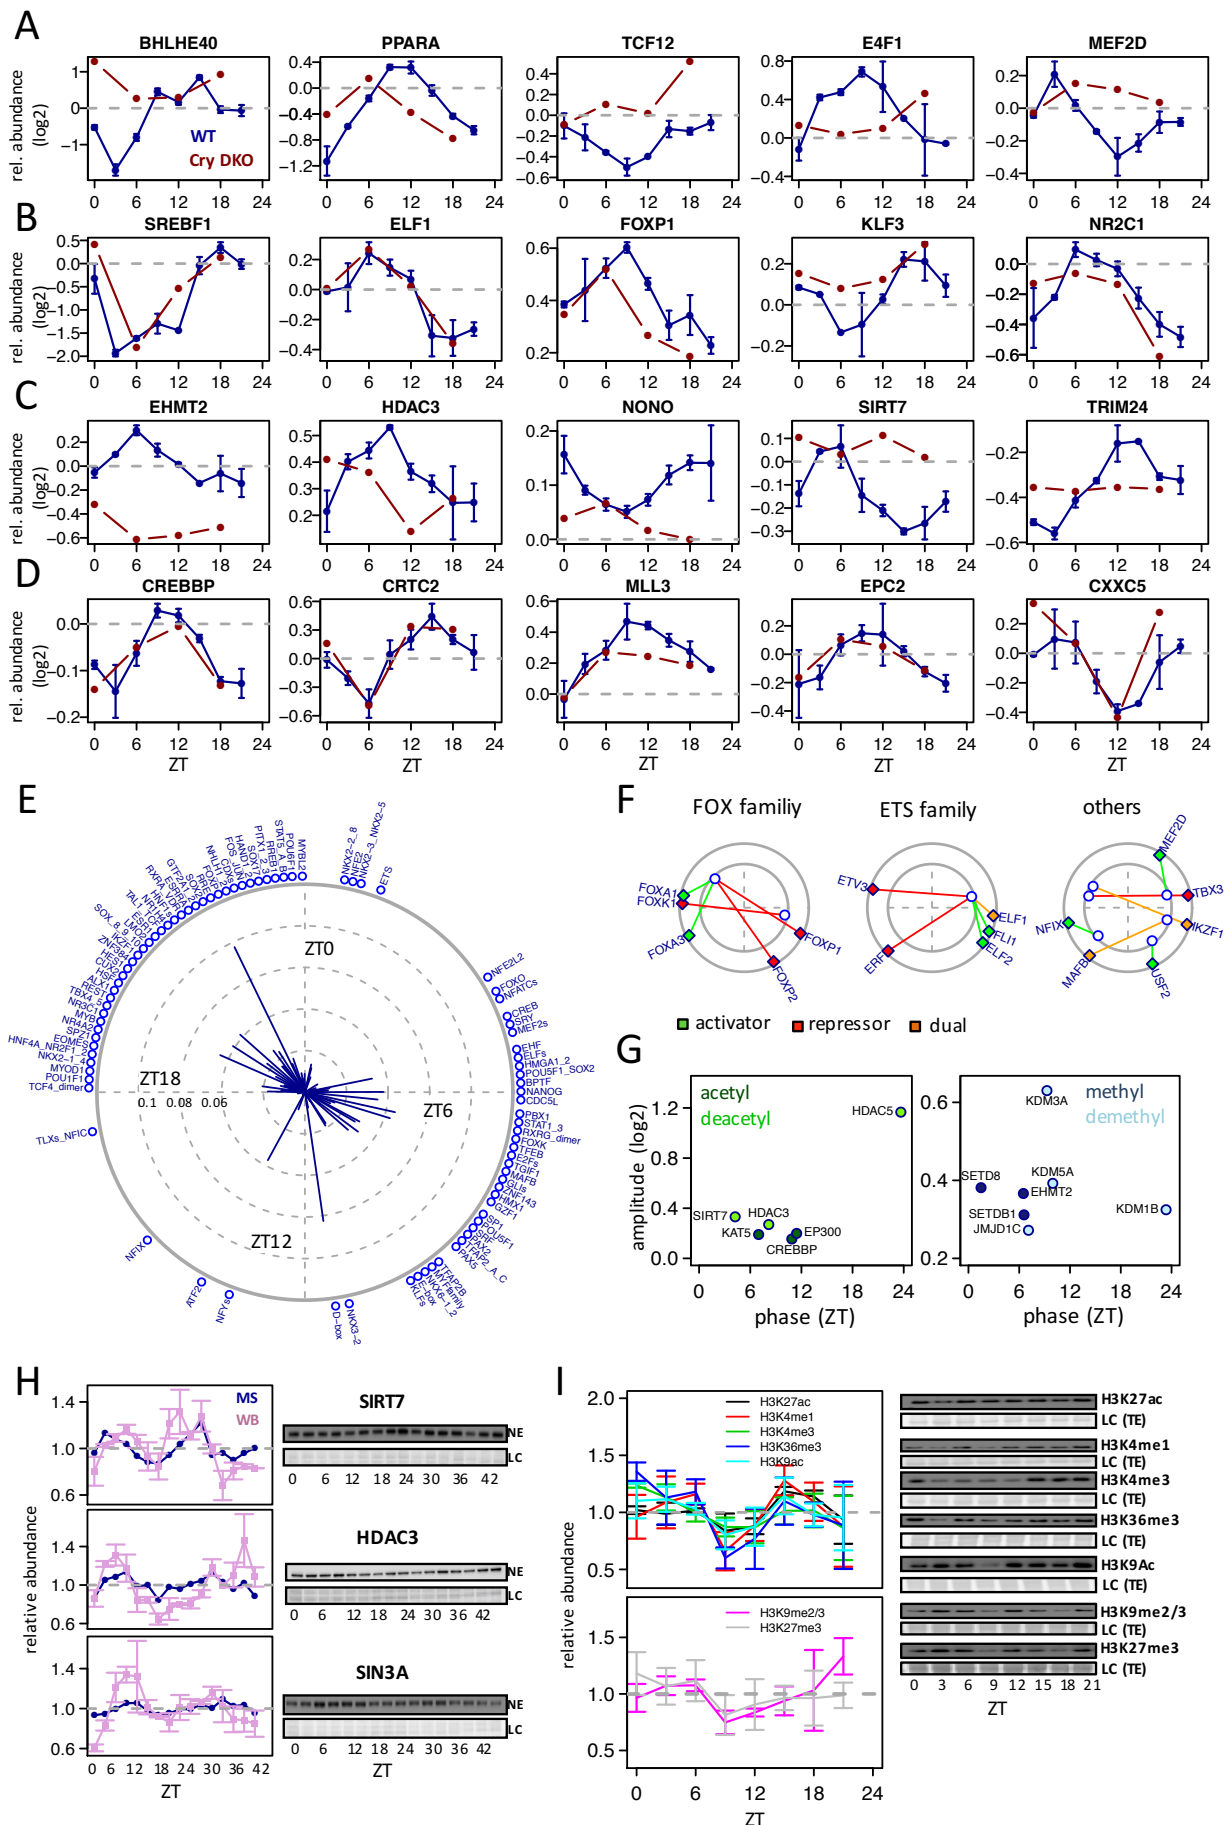

A-D. Individual examples of rhythmic TFs (A, B) or co-regulators (C, D) losing (A and C) or retaining (B and D) their rhythms in *Cry1/2* DKO mice.

E. Rhythmic motif activities inferred with DHS and RNA-seq data (pre-mRNA). Direction of lines indicate peak activity times and distances to the center of solid lines indicate activity amplitudes per motif.

F. Peak times of nuclear TF accumulations (outer circle) compared with peak activity times of corresponding DNA binding motif (inner circle) for TF of the FOX and ETS families, and other TFs. Color code indicated the commonly accepted transcriptional function of each TF, namely activator (green), repressor (red) or dual regulation (orange).

G. Amplitude ( $\log_2$ ) and phases of rhythmic (FDR < 0.05) transcriptional co-regulators involved in histone acetylation (HATs and HDACs) and methylation (HMTs and HDMs).

H. Nuclear accumulations of rhythmic regulators, SIRT7, HDAC3 and SIN3A, confirmed by Western Blot analysis on nuclear protein extracts (NE). Data are normalized to the temporal mean. The two biological replicates are shown as ZT0-ZT21 (replica 1) and ZT24-ZT45 (replica 2). For the Western blots, the sixteen time points show the mean and standard error (SEM) from two independent biological samples. Naphtol blue black staining of the membranes was used as a loading control (LC) and serves as references for normalisation of the quantified values.

I. Active (H3K27ac, H3K4me1, H3K4me3, H3K36me3 and H3K9ac) and repressive (H3K9me2/3 and H3K27me3) histone modifications are measured and quantified by WB analysis in total protein extracts (TE). Data are normalized to the temporal mean and the eight time points show the mean and standard error (SEM) from four independent biological samples.

**Figure S7. Additional evidence for cell-cycle regulation and analysis of IHC images, related to Fig 7**

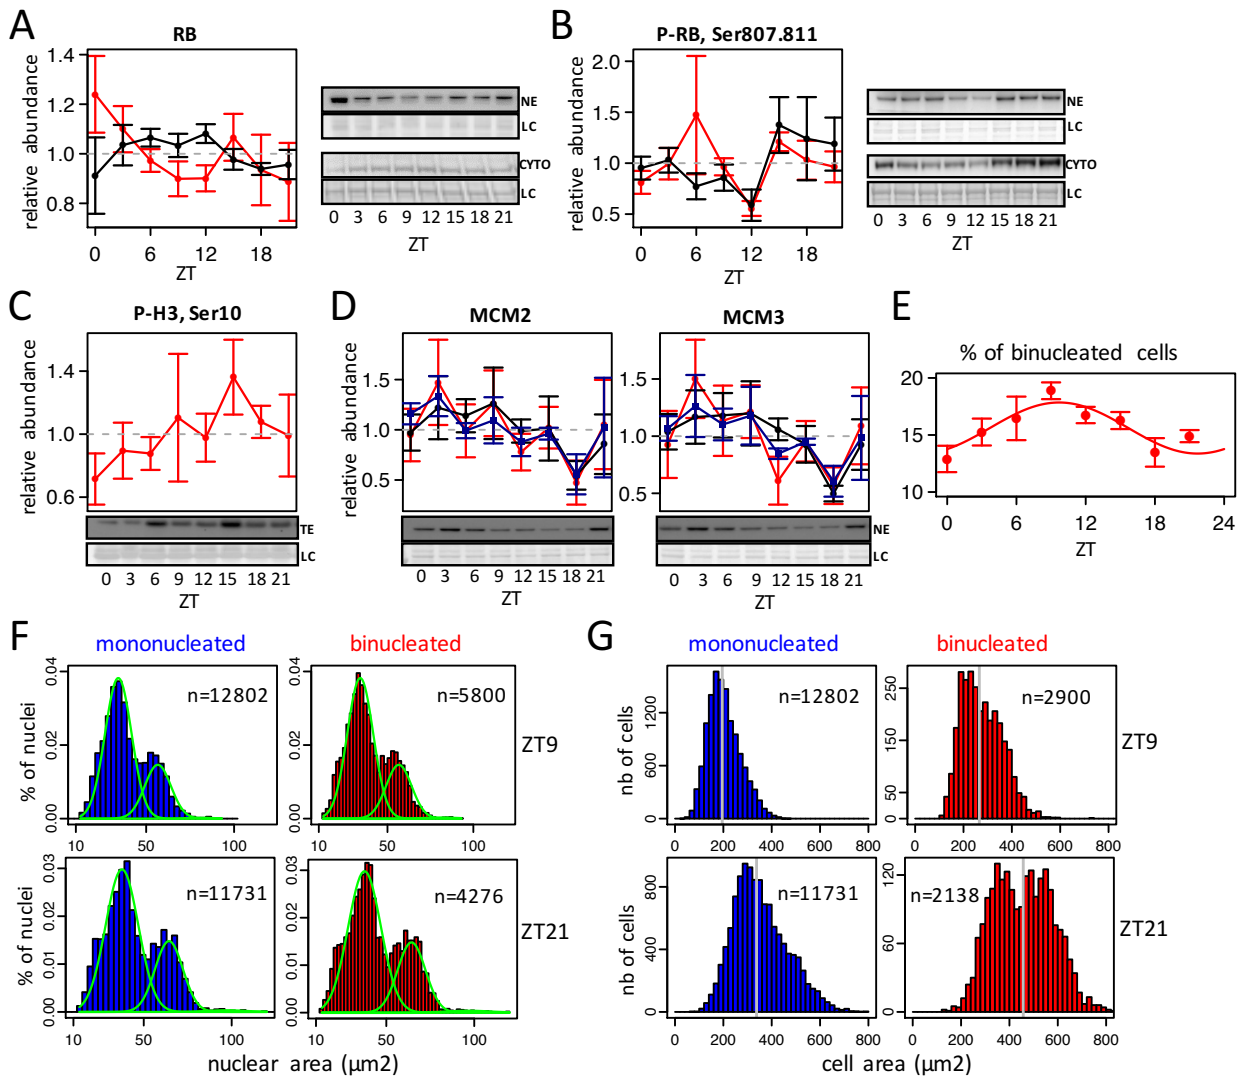

For A to D, data are normalized to the temporal mean and each time point shows the mean and standard error (SEM) from four independent biological samples. Naphtol blue black staining of the membranes was used as a loading control (LC) and also as references for normalisation of the quantified values.

A-D. Temporal accumulations for RB protein (A) and its phosphosites P-RB Serine 807 and 811 (B) measured by WB on both nuclear (NE) and cytoplasmic (CYTO) protein extracts. (C) P-H3 Serine 10 measured by WB using total protein extract (TE). (D) MCM2 and MCM3, two subunit of MCM complex, measured by WB analysis on NE.

E. Diurnal proportion of bi-nucleated hepatocytes extracted from IHC images analysis. Each time point shows the mean and standard error (SEM) of four independent biological samples.

F. Nuclear area distribution for nuclei within mono and bi-nucleated cells at ZT9 and ZT21. Best fits to these distributions using the mixture of Gaussian distribution are also shown. Note that the sizes of the nuclei at the observed peaks exactly match earlier measurements (Danielsen et al., 1986), thus clearly identifying the peak near  $35 \mu\text{m}^2$  with 2N and that near  $54 \mu\text{m}^2$  with 4N nuclei.

G. Cell area distribution for mono- and bi-nucleated hepatocytes at ZT9 and ZT21.

## Supplemental Tables

### **Table S1. Complete dataset of the nuclear proteome in mouse liver identified by SILAC-base MS, related to Fig 1**

Sheet1: Relative abundance (normalized L/H ratios from the MaxQuant analysis) for all distinct 4820 proteins identified by SILAC MS in the nucleus of mouse liver at different time points and in all replicates under Light/Dark conditions.  
Sheet2: Raw data with peptides counts from MaxQuant analysis at different time points in all replicates.  
Sheet3: Description of the column headers for Sheet1  
Sheet4: Description of the column headers for Sheet2

### **Table S2. List of 522 rhythmic nuclear proteins (FDR<0.05), related to Fig 2**

Sheet 1. Biochemical functions and cellular localization of these rhythmic nuclear proteins  
Sheet 2. Relative abundance of rhythmic nuclear proteins and their corresponding phases and amplitudes in WT mice and their correlation in *Cry1/2* DKO  
Sheet 3. Corresponding mRNA expression measured by total RNA-seq  
Sheet 4. Corresponding previously published proteomic data in whole liver extracts (Mauvoisin et al., 2014)  
Sheet 5. Description of the column headers for Sheets1-4

### **Table S3. List of rhythmic nuclear complexes with SVD analysis, related to Fig 3**

Sheet 1. Phase, amplitudes and related functions of the identified rhythmic complexes  
Sheet 2. All known complexes with at least two detected subunits in nuclear proteome and corresponding SVD analysis  
Sheet 3. Description of the column headers for Sheets1-2

### **Table S4. Rhythmic nuclear proteins involved in ribosome biogenesis and DNA repair, related to Fig 4**

Sheet 1. Rhythmic nuclear proteins with identified phases and amplitudes involved in different steps of ribosome biogenesis  
Sheet 2. Rhythmic nuclear proteins with identified phases and amplitudes involved in different steps of DNA repair process  
Sheet 3. Description of the column headers for Sheets1-2

### **Table S5. Complete dataset of phosphorylated sites of nuclear proteins in mouse liver, related to Fig 5**

Sheet 1. Complete diurnal phosphoproteome dataset and corresponding rhythmicity analysis  
Sheet 2. Kinase motifs with rhythmic activities inferred using linear model with regularization  
Sheet 3. Description of the column headers for Sheets1-2

### **Table S6. Rhythmic transcription factors (TF), co-regulators, and TF motifs activity inference, related to Fig 6**

Sheet 1. Rhythmic TF quantified in nuclear proteome and/or nuclear phosphoproteome  
Sheet 2. Rhythmic co-regulators quantified in nuclear proteome  
Sheet 3. TF motifs with rhythmic activities inferred from DNase hypersensitive sites (DHS) and pre-mRNAs datasets  
Sheet 4. Comparison between rhythmic TF and their corresponding motif activity  
Sheet 5. Description of the column headers for Sheets1-4

### **Table S7. Antibodies used in the different experiments, related to Experimental Procedures**

## Supplemental Experimental Procedures

### Preparation of whole cell protein extracts

Livers were homogenized in a lysis buffer containing 8M Urea and protease inhibitors (cOmplete ULTRA<sup>®</sup>, Roche), a phosphatase inhibitor cocktail (PhosphoSTOP<sup>®</sup>, Roche), and deacetylase inhibitors (AGK7, salermide, and trichostatin A, all from SantaCruz<sup>®</sup> Biochemicals). After 20 min incubation on ice, extracts were centrifuged 10 min at 20,000 g. The resulting supernatants constitute total protein extracts (TE).

### Preparation of nuclei, and cytoplasmic and nuclear protein extracts

For nuclei purification, livers were homogenized in sucrose homogenization buffer containing 2.2 M sucrose, 15 mM KCl, 2 mM EDTA, 10 mM HEPES (pH 7.6), 0.15 mM spermin, 0.5 mM spermidin, 1 mM DTT, and protease inhibitors (0.5 mM PMSF, 10 µg/ml Aprotinin, 0.7 µg/ml Pepstatin A, and 0.7 µg/ml Leupeptin). Lysates were deposited on a sucrose cushion containing 2.05 M sucrose, 10% glycerol, 15 mM KCl, 2 mM EDTA, 10 mM HEPES (pH 7.6), 0.15 mM spermin, 0.5 mM spermidin, 1 mM DTT, and protease inhibitors. After 45 min of centrifugation at 105,000 g at 4°C, the resulting supernatants were harvested and constitute the cytoplasmic extracts (CYTO).

On the other hand, the nucleus pellets were suspended in a nucleus buffer composed of 10 mM HEPES (pH 7.6), 100 mM KCl, 0.1 mM EDTA, 10% Glycerol, 0.15 mM spermine, 0.5 mM spermidine, 0.1 mM NaF, 0.1 mM sodium orthovanadate, 0.1 mM ZnSO<sub>4</sub>, 1 mM DTT, and protease inhibitors (0.5 mM PMSF, 10 µg/ml Aprotinin, 0.7 µg/ml Pepstatin A, and 0.7 µg/ml Leupeptin). This constituted the purified nuclei fractions used for Immunofluorescence and FACS analysis.

Nuclear protein extracts were obtained by adding an equal volume of NUN buffer (2 M urea, 600 mM NaCl, 50 mM HEPES (pH 7.6), 1 mM DTT, protease inhibitors (cOmplete ULTRA<sup>®</sup>, Roche), a phosphatase inhibitor cocktail (PhosphoSTOP<sup>®</sup>, Roche), and deacetylase inhibitors AGK7, salermide, and trichostatin A (all from SantaCruz<sup>®</sup> Biochemicals), followed by a 20 min incubation on ice. The supernatants resulting from a 10 min centrifugation at 21,000g at 4°C constituted the nuclear extracts (NE) and were used to perform proteins and phosphoproteins MS-analysis.

Protein extracts were quantified using a BCA protein assay kit (Thermo Fisher Scientific) and were also resolved by SDS-PAGE following western blots using standard procedures. References for the antibodies are given in Table S7.

### SILAC-based MS analysis of nuclear proteomics and phosphoproteomics

**Sample preparation:** Equal amount of nuclear proteins extracted from two non-SILAC mice were pooled for the 16 samples (two biological replicates for eight time points during two consecutive days; WT mix). A complex and common reference SILAC protein mix (SILAC mix) was prepared from sixteen SILAC protein samples (6 SILAC male and 10 SILAC female livers) collected at ZT0 and ZT12 (Figure S1). Thereafter, the 16 mixes were obtained by adding the same amount of SILAC mix to the WT mixes. An equivalent procedure was applied for the 4 *Cry1/2* DKO, protein samples collected every 6 hours for 24 hours and the same SILAC mix was used as a reference. Mixed heavy/light extracts were processed in parallel.

**Nuclear protein SILAC-MS and data analysis:** Mixed samples were reduced with 5mM DTT and alkylated with 18.75 mM iodoacetamide for 30 min at room temperature in the dark. After an ethanol-acetate precipitation, they were resuspended in 250 mM triethylammonium bicarbonate pH 8.0 containing 4M urea and digested overnight at 37°C with sequencing grade modified trypsin (Promega) at a 1:50 (w/w) trypsin:protein ratio. The obtained peptide mixtures (250 µg total material) were desalted on SepPak C18 cartridges (Waters Corp.), dried, dissolved in 4M Urea with 0.1 % Ampholytes pH 3-10 (GE Healthcare) and fractionated by off-gel focusing as described (Geiser et al., 2011). The 10 fractions obtained were desalted on a microC18 96-well plate (Waters Corp.), dried and resuspended in 0.1 % formic acid, 3 % (v/v) acetonitrile for LC-MS/MS analysis. Samples were analyzed on a hybrid linear trap LTQ-Orbitrap Velos mass spectrometer (Thermo Fisher Scientific) interfaced via a nanospray source to a Dionex RSLC 3000 nanoHPLC system (Dionex). Peptides were separated on a reversed-phase Acclaim Pepmap nanocolumn (75 µm ID x 25 cm, 2.0 µm, 100 Å, (Dionex)) with a gradient from 5 to 85 % acetonitrile in 0.1 % formic acid (total time: 200 min) and a flow rate of 300 nl/min. Full MS survey scans were performed at 60'000 resolution. In data-dependent acquisition controlled by Xcalibur 2.1 software (Thermo Fisher Scientific), the twenty most intense multiply charged precursor ions detected in the full MS survey scan were selected for CID fragmentation in the LTQ linear trap with an isolation window of 4.0 m/z and then dynamically excluded from further selection during 35s.

MS data were analyzed and quantified with MaxQuant version 1.3.0.5 (Cox and Mann, 2008), using Andromeda as search software (Cox et al., 2011) against UniProt (release 2012\_02) database restricted to mouse (*Mus musculus*) taxonomy and a custom database containing usual contaminants (digestion enzymes, keratins, etc). Cleavage specificity was trypsin/P (cleavage after K, R, including KP and RP) with two missed cleavages. Mass tolerances were of 6 ppm for the precursor and 0.5 Da for CID tandem mass spectra. The iodoacetamide derivative of cysteine was specified as a fixed modification, and oxidation of methionine and protein N-terminal acetylation were specified as variable modifications. Protein identifications were filtered at 1 % FDR established by MaxQuant against a reversed sequence database. A minimum of one unique peptide was necessary to discriminate sequences which shared peptides. Sets of protein sequences which could not be discriminated based on identified peptides were listed together as protein groups and are fully reported in Table S1. Details of peak quantitation and protein ratio computation by MaxQuant are described elsewhere (Cox and Mann, 2008). Raw mass spectrometry data and search engine outputs have been

deposited to the ProteomeXchange Consortium (proteomexchange.org) via the PRIDE partner repository (Vizcaino et al., 2016) with the dataset identifier PXD003818.

**Nuclear phosphoprotein SILAC MS and data analysis:** Protein disulphide bridges were reduced with 10 mM tris(2-carboxyethyl)phosphine hydrochloride for 1 hour at 55 °C. Alkylation was performed with 18.75 mM iodoacetamide for 30 min at room temperature in the dark. To remove lipids and salts, proteins were precipitated using chloroform/methanol. Briefly, methanol, chloroform and water were added sequentially. Mixtures were centrifuged at 13'000 rpm for 5 min at 4 °C. Upper and lower phases were discarded. The white disk precipitates were additionally washed with methanol prior to be dried for 5 min under vacuum. Obtained pellets were resuspended in 100 mM triethylammonium hydrogen carbonate buffer and proteins were digested with premixed Lys-C/trypsin (Promega) 2:100 (w/w) at 37 °C overnight. Samples were cleaned up using Oasis HLB cartridges (Waters) and finally dried. Purified peptides (350 µg of heavy/light material) were then enriched using TiO<sub>2</sub> Mag Sepharose Magnetic beads (GE Healthcare) following manufacturer instructions for enrichment of phosphopeptides. The enriched samples were dissolved in 25 µL water/acetonitrile/formic acid 96.9/3/0.1 for RP-LC MS/MS. RP-LC MS/MS was performed on a hybrid linear ion trap-Orbitrap (LTQ-OT) Elite equipped with an Ultimate 3000 RSLC nano system (Thermo Fisher Scientific). Proteolytic peptides (injection of 5 µl of sample) were trapped on an Acclaim PepMap 75 µm × 2 cm (C18, 3 µm, 100 Å) pre-column and separated on an Acclaim PepMap RSLC 75 µm × 50 cm (C18, 2 µm, 100 Å) column (Thermo Scientific) coupled to a stainless steel nanobore emitter (40 mm, OD 1/32") mounted on a Nanospray Flex Ion Source (Thermo Fisher Scientific). The analytical separation was run for 150 min using a gradient that reached 30% of acetonitrile after 140 min and 80% of acetonitrile after 150 min at a flow rate of 220 nl/min. For MS survey scans, the OT resolution was 120'000 (ion population of 1 × 10<sup>6</sup>) with an m/z window from 300 to 1'500. For MS/MS with collision-induced dissociation at 30% of the normalized collision energy, ion population was set to 1 × 10<sup>4</sup> (isolation width of 2), and a maximum injection time of 150 ms in the LTQ. A maximum of 20 precursor ions (most intense) were selected for MS/MS. Ions with 1+ and unassigned charge-states were rejected from MS/MS analysis. Dynamic exclusion was set for 60 s within a ± 5 ppm window. A lock mass of m/z = 445.1200 was used. Each sample was analyzed in triplicate.

MaxQuant (Cox and Mann, 2008) (version 1.4.1.2) was used for data processing. Identification was performed using Andromeda (Cox et al., 2011) as search engine against the mouse UniProtKB database (26/06/2013 release; 50818 entries). Variable amino acid modifications were acetyl (Protein N-term), phospho (STY), and oxidation (M). Carbamidomethyl (C) was set as fixed modification. Trypsin/P (i.e., cleaves after lysine and arginine also if a proline follows) was selected as the proteolytic enzyme, with a maximum of two potential missed cleavages. Peptide and fragment ion tolerance were set to, respectively, 6 ppm and 0.5 Da. Peptide-spectrum match, protein and site FDRs were fixed at 1% against a reversed sequence database. Quantification was performed with stable isotope with a multiplicity of 2 using lysine <sup>13</sup>C<sub>6</sub> as heavy labels. A maximum of 3 labeled amino acids per peptide was specified. Site quantification used least modified peptide.

The mass spectrometry proteomics data have been deposited to the ProteomeXchange Consortium (proteomexchange.org) via the PRIDE partner repository (Vizcaino et al., 2016) with the dataset identifier PXD004191.

### Rhythmicity analysis for nuclear proteins and phosphoproteins

We assessed the rhythmicity in temporal nuclear accumulation of proteins and phosphoproteins using harmonic regression, as previously (Mauvoisin et al., 2014). Briefly, focusing on only 24-h periodicity (data are generated under 24-h LD cycles), we used a multiple linear regression for each relative protein time trace  $y(t)$  (transformed to log<sub>2</sub> units). For this analysis, we used the relation:

$$y(t) = \mu + a \sin\left(2\pi \frac{t}{24}\right) + b \cos\left(2\pi \frac{t}{24}\right) + \text{noise}$$

where  $\mu$  is the mean, whereas  $a$  and  $b$  are the coefficients of cosine and sine functions with period of 24 h, respectively. The resulting p-values of all proteins are used to estimate false discovery rate (FDR) by the Benjamini–Hochberg method (Benjamini and Hochberg, 1995). All test statistics are provided in Table S1 and S2.

To test whether rhythm of nuclear proteins in WT persists in *Cry1/2* DKO mice, we applied linear regressions combined with model selection, similar to (Atger et al., 2015). Briefly the same multiple linear regression to temporal profiles of nuclear proteins under these two conditions by considering three different cases: nuclear protein is rhythmic in KO condition with the same parameters ( $\mu$ ,  $a$  and  $b$ ) as in WT (M1), or rhythmic with different parameters (M2); the third case is that it is non-rhythmic in KO condition (M3). A model selection approach with Bayesian information criterion (BIC) is used to control the model complexity and select the optimal model given the data. Specifically, for each model (M1, M2 and M3), multiple linear regression is performed and corresponding BIC is computed with the formula:

$$BIC = n \log\left(\frac{RSS}{n}\right) + k \log(n)$$

where  $RSS$  the sum of residuals square of the multiple linear regression,  $n$  the number of data and  $k$  the number of parameters. Schwarz weights (or probability of being the optimal model) are assigned to each model with the following expression:

$$w_j = e^{-\frac{1}{2}BIC_{Mj}} / \sum_j e^{-\frac{1}{2}BIC_{Mj}}$$

The rhythm of nuclear proteins in KO condition is considered to persist with  $w_1 > 0.5$ .

### Identification of rhythmic protein complexes with singular value decomposition (SVD)



To annotate known protein complexes, we used protein complexes of mouse, rat and human from the CORUM database (Ruepp et al., 2010), and we manually added other known proteins complexes implicated in the circadian clock, transcription and histone modification, but missing in the CORUM database, for instance, the PER complex, BMAL1-CLOCK, REV-ERB $\alpha$ -NCOR1-HDAC3, RNA polymerase I, II, and III, H3K4 methyltransferase and HIRA histone chaperon complexes. Annotated known complexes in which at least two subunits detected with >8 out of 16 samples in our nuclear protein dataset were considered. In addition, missing data in some subunits, if any, were interpolated with cosine-curve fitting. To identify protein complexes showing diurnal accumulation in the nucleus, we applied the singular value (SVD) analysis to the matrix  $E_{gt}$ , in which each row represents standardized temporal profile of each subunit belonging to the same protein complex (Alter et al., 2000). SVD gives the following expression:

$$E_{gt} = \sum_r U_{gr} S_r V_{rt}^T$$

Where  $g$  represents the subunit;  $t$  the time point. Each column of  $U_{gr}$  is the eigengene (eigensubunit in this case) and each column of  $V_{rt}$  is the eigenarray (eigentime here) vector.  $S$  is a weight corresponding to the  $r$ 'th component. If a protein complex is rhythmic, temporal profiles of its subunits are expected to be highly correlated. To measure such correlation between subunits, we calculated the fraction of variance captured by the first component  $S_1 / \sum_k S_k$ . To test statistical significance, background distributions for complexes with different number of subunits were calculated by randomly choosing proteins not annotated as subunits of complexes. If the fraction of variance captured by the first component is significant ( $p$ -val < 0.05), the rhythmicity and phase of protein complex were computed with the first eigen-subunit and eigentime vectors.

### Inference of rhythmic motif activity of TFs with DNase hypersensitive sites (DHS) and pre-mRNAs

**TF motif library curation:** To obtain a relatively non-redundant motif library, we used the database of SwissRegulon (Pachkov et al., 2013), in which each TF is associated with only one unique motif. To cover as many as possible rhythmic TFs identified in our dataset of nuclear proteins, we added motifs previously implicated in circadian rhythms for ZNF187, CREBRF, HMBOX1, ETV3 and FOXP1 from Transfac (Matys et al., 2006) and HNF1B, FOXP1 and USF2 from Jaspar (Mathelier et al., 2014).

**Linear model with Elastic-net regularization:** To infer rhythmic motif activity of TFs, we used DHS hotspots of adult mouse liver from ENCODE (Yue et al., 2014) and temporal profiles of pre-mRNA (intronic signals as proxies of transcription) from total RNA-seq data measured in the same light dark and night-restricted feeding conditions in mouse liver (Atger et al., 2015) ([GSE73552](#)) as our nuclear protein dataset. We modeled rhythms in transcription (measured with rhythmic pre-mRNAs with FDR < 0.1 and relative amplitude > 0.2) as a linear combination of diurnal activities of TF motifs in the DHS regions  $\pm 10$  kb around transcriptional start sites (TSSs) annotated by Ensemble mm10. In particular, if multiple TSSs were annotated for one gene, only those within DHS regions were considered to be active. The model is expressed as follows:

$$E_g(t) = N_{gm} A_m(t) + \text{noise}$$

where  $E_g(t)$  is the centered rhythmic transcription for gene  $g$  at time  $t$ ;  $N_{gm}$  is the number of occurrence for motif  $m$  scanned by FIMO (Grant et al., 2011) in all DHS regions  $\pm 10$  kb around the active TSSs of gene  $g$ ;  $A_m(t)$  represents the temporal activity of motif  $m$  at time  $t$ . To reduce the number of parameters we performed the regression in the subspace of 24 24hr periodic functions, leaving only two free parameters per motif  $m$ . To control for over-fitting and also redundancy of motifs, we employed Elastic-net penalty in the linear regression (implemented in R package glmnet (Friedman et al., 2010)). In particular, the mixing parameter  $\alpha = 0.1$  was empirically chosen and the parameter  $\lambda$  was optimized by cross-validation. After obtaining the rhythmic motif activities, redundant motifs were removed and some motif names were manually modified to match the common terminologies (Table S6).

### Inference of kinases with rhythmic activities

To predict kinases with rhythmic activities, we used all rhythmic phosphorylation sites ( $p$ -value < 0.05) with non-rhythmic nuclear proteins ( $p$ -value > 0.05) and the kinase motif library from *PhosphoNetworks* (Hu et al., 2014). Windows of 15 amino acids centered at the phosphorylation site are scanned by FIMO (Grant et al., 2011) to find hits to kinase motifs, which are potentially responsible for the rhythmic phosphorylation. Thus, we have a motif presence/absence matrix, in which each row is presence/absence of kinase motifs for each rhythmic phosphorylation site and each column indicates targets of each kinase motif. In addition, to avoid considering redundant motifs, motifs with high correlations in this matrix are manually clustered (Table S5). Here, we used two different methods to identify kinases with rhythmic activities.

**Phase enrichment analysis:** We used phase windows of 3 hrs shifting every 0.2 hr from 0 to 24 hrs. For each position of phase windows, rhythmic phosphorylation sites with phases within the windows are considered; enrichment of each kinase motif is calculated with hypergeometric distribution, in which the background is the total number of targets in the motif presence/absence matrix. Enriched motifs ( $p$ -value < 0.05) are selected as predicted candidates.

**Linear model with regularization:** An alternative method accounting for the amplitudes of rhythmic phosphorylation sites is the linear model with elastic-net regularization, which is very similar to the previous inference of rhythmic motif activities for TFs. Here the mixing parameter  $\alpha = 0.2$  was used.

### **FACS experiment**

Purified nuclei were incubated at room temperature for 30 min with a staining solution containing 50 µg/ml of propidium iodide (Sigma Aldrich), 10 µg/ml RNase A (Sigma Aldrich) and 0.1 % v/v Igepal CA-630 (Sigma Aldrich) in PBS. Samples were then acquired by means of a Canto II analyzer (Becton-Dickinson) equipped with a 488 nm laser line used for PI excitation. Fifty-thousand events for each sample were acquired in the forward/side scatter gate. After debris and doublet exclusion, the PI fluorescence was collected using a  $585 \pm 42$  nm band-pass filter and visualized in a monovariate histogram. To accurately define the 2N peak, some nuclei samples were spiked with whole blood cells from the same animal at a 1:20 ratio (nuclei/blood). Data were stored in Flow Cytometry Standard files (.fcs, version 3.1) and analyzed using FCS Express 4.0 (De Novo Software). Doublets were excluded by gating on area vs height signals and data were expressed as the percentage of nuclei having different ploidy (2N, 4N, 8N) in the gate of single events.

### **Immunohistochemistry (IHC) experiment**

Mouse livers were fixed using Formalin (Sigma Aldrich) for 24 hrs and rinse twice with PBS before being embedded in paraffin and cut in 4µm thick-slices. Tissue sections were deparaffinized and rehydrated in an ethanol series. After PBS washing, sections were treated 10 minutes with 3 % hydrogen peroxide in PBS to quench endogenous peroxidase. Heat induced epitope retrieval was then performed with 10 mM Tri-Na citrate 20 min at 95°C. After washing, sections were blocked in 1% BSA in PBS for 30 min and incubated with β-catenin or Ki-67 antibodies overnight at 4°C. After washing, secondary antibody was incubated 40 min at RT. Cell nuclei were additionally stained with Mayer's hematoxylin. Entire livers slices were imaged using an Olympus slide scanner at 20X magnification.

### **IHC image segmentation and estimation of different polyploid cell populations**

50% (Ki-67 marker) and 25% (for β-catenin) of whole-liver IHC images from the centers of the slices were automatically segmented using a custom script in MATLAB, and using the same parameters across all time points. In particular, for the slices with plasma membrane stained by β-catenin and nuclei by hematoxylin, cells and nuclei were first segmented separately using standard functions from Image Processing Toolbox in MATLAB (e.g. imopen, bwareaopen and watershed). Only cells with both detected nuclei and plasma membrane were then kept. Moreover, cells with more than two nuclei were not analyzed. At the end, 10,000-20,000 of cells were identified with all measured features (e.g. number of nuclei per cell, nuclear and cell areas) using the function 'regionprops' for each time point.

After IHC image segmentation, we found that nuclear areas consistently show bimodal/trimodal distributions in both mono- and bi-nucleated cells across all time point (Fig S7F). It is known that nuclear areas are approximately proportional to their DNA contents (Danielsen et al., 1986; Martin et al., 2002) and we thus modeled those distributions as mixtures of Gaussians to estimate the population sizes of nuclei with a certain ploidy. In addition, to estimate the parameters of the mixture model, we assumed that two nuclei in bi-nucleated cells have the same DNA content and we did not consider liver aneuploidy (Duncan, 2013). Moreover, we constrained the total fractions of nuclear ploidy to those measured by FACS (step 1). Finally we refit (step 2) the proportions of nuclear areas of mono- and bi-nucleated cells in each sample, using the obtained parameters from step 1 (e.g. mean and variance of nuclear areas). The estimated proportions of nuclei with different DNA contents for mono- and bi-nucleated cells, and the percentages of mono- and bi-nucleated cells, allowed us to estimate fractions of all different polyploid cell populations (Fig. 7E).

### **Glycogen content**

Glycogen amount in liver was estimated using the method from (Lo et al., 1970). In brief, frozen liver were incubated 20 min in KOH at 100°C. Then, 95% ethanol was added and after an 840 g centrifugation at 4°C, the glycogen pellet was suspended in water. Then 10 µl of this suspension was diluted fifteen times and absorbance was measured at 490 nm after addition of 150µl of Phenol 5% and 750 µl of sulfuric acid 98%.

## Supplemental References

- Alter, O., Brown, P.O., and Botstein, D. (2000). Singular value decomposition for genome-wide expression data processing and modeling. *Proc Natl Acad Sci U S A* 97, 10101-10106.
- Atger, F., Gobet, C., Marquis, J., Martin, E., Wang, J., Weger, B., Lefebvre, G., Descombes, P., Naef, F., and Gachon, F. (2015). Circadian and feeding rhythms differentially affect rhythmic mRNA transcription and translation in mouse liver. *Proc Natl Acad Sci U S A* 112, E6579-E6588.
- Benjamini, Y., and Hochberg, Y. (1995). Controlling the False Discovery Rate: A Practical and Powerful Approach to Multiple Testing. *J R Statist Soc B* 57, 289-300.
- Binder, J.X., Pletscher-Frankild, S., Tsafou, K., Stolte, C., O'Donoghue, S.I., Schneider, R., and Jensen, L.J. (2014). COMPARTMENTS: unification and visualization of protein subcellular localization evidence. *Database* 2014.
- Cox, J., and Mann, M. (2008). MaxQuant enables high peptide identification rates, individualized p.p.b.-range mass accuracies and proteome-wide protein quantification. *Nat Biotechnol* 26, 1367-1372.
- Cox, J., Neuhauser, N., Michalski, A., Scheltema, R.A., Olsen, J.V., and Mann, M. (2011). Andromeda: A Peptide Search Engine Integrated into the MaxQuant Environment. *J Proteome Res* 10, 1794-1805.
- Danielsen, H., Lindmo, T., and Reith, A. (1986). A method for determining ploidy distributions in liver tissue by stereological analysis of nuclear size calibrated by flow cytometric DNA analysis. *Cytometry* 7, 475-480.
- Duncan, A.W. (2013). Aneuploidy, polyploidy and ploidy reversal in the liver. *Semin Cell Dev Biol* 24, 347-356.
- Friedman, J., Hastie, T., and Tibshirani, R. (2010). Regularization Paths for Generalized Linear Models via Coordinate Descent. *J Stat Softw* 33, 1-22.
- Geiser, L., Dayon, L., Vaezzadeh, A.R., and Hochstrasser, D.F. (2011). Shotgun proteomics: a relative quantitative approach using Off-Gel electrophoresis and LC-MS/MS. *Methods Mol Biol* 681, 459-472.
- Grant, C.E., Bailey, T.L., and Noble, W.S. (2011). FIMO: scanning for occurrences of a given motif. *Bioinformatics* 27, 1017-1018.
- Hu, J., Rho, H.-S., Newman, R.H., Zhang, J., Zhu, H., and Qian, J. (2014). PhosphoNetworks: a database for human phosphorylation networks. *Bioinformatics* 30, 141-142.
- Kislinger, T., Cox, B., Kannan, A., Chung, C., Hu, P., Ignatchenko, A., Scott, M.S., Gramolini, A.O., Morris, Q., Hallett, M.T., Rossant, J., Hughes, T.R., Frey, B., and Emili, A. (2006). Global Survey of Organ and Organelle Protein Expression in Mouse: Combined Proteomic and Transcriptomic Profiling. *Cell* 125, 173-186.
- Lo, S., Russell, J.C., and Taylor, A.W. (1970). Determination of glycogen in small tissue samples. *J Appl Physiol* 28, 234-236.
- Martin, N.C., McCullough, C.T., Bush, P.G., Sharp, L., Hall, A.C., and Harrison, D.J. (2002). Functional analysis of mouse hepatocytes differing in DNA content: volume, receptor expression, and effect of IFN $\gamma$ . *J Cell Physiol* 191, 138-144.
- Mathelier, A., Zhao, X., Zhang, A.W., Parcy, F., Worsley-Hunt, R., Arenillas, D.J., Buchman, S., Chen, C.-y., Chou, A., Ienasescu, H., Lim, J., Shyr, C., Tan, G., Zhou, M., Lenhard, B., Sandelin, A., and Wasserman, W.W. (2014). JASPAR 2014: an extensively expanded and updated open-access database of transcription factor binding profiles. *Nucleic Acids Res* 42, D142-D147.
- Matys, V., Kel-Margoulis, O.V., Fricke, E., Liebich, I., Land, S., Barre-Dirrie, A., Reuter, I., Chekmenev, D., Krull, M., Hornischer, K., Voss, N., Stegmaier, P., Lewicki-Potapov, B., Saxel, H., Kel, A.E., and Wingender, E. (2006). TRANSFAC $\text{\textcircled{R}}$  and its module TRANSCOMP $\text{\textcircled{R}}$ : transcriptional gene regulation in eukaryotes. *Nucleic Acids Res* 34, D108-D110.
- Mauvoisin, D., Wang, J., Jouffé, C., Martin, E., Atger, F., Waridel, P., Quadroni, M., Gachon, F., and Naef, F. (2014). Circadian clock-dependent and -independent rhythmic proteomes implement distinct diurnal functions in mouse liver. *Proc Natl Acad Sci U S A* 111, 167-172.
- Pachkov, M., Balwierz, P.J., Arnold, P., Ozonov, E., and van Nimwegen, E. (2013). SwissRegulon, a database of genome-wide annotations of regulatory sites: recent updates. *Nucleic Acids Res* 41, D214-D220.
- Ruepp, A., Waegle, B., Lechner, M., Brauner, B., Dunger-Kaltenbach, I., Fobo, G., Frishman, G., Montrone, C., and Mewes, H.W. (2010). CORUM: the comprehensive resource of mammalian protein complexes-2009. *Nucleic Acids Res* 38, D497-D501.
- The UniProt, C. (2015). UniProt: a hub for protein information. *Nucleic Acids Res* 43, D204-D212.
- Uhlén, M., Fagerberg, L., Hallström, B.M., Lindskog, C., Oksvold, P., Mardinoglu, A., Sivertsson, Å., Kampf, C., Sjöstedt, E., Asplund, A., Olsson, I., Edlund, K., Lundberg, E., Navani, S., Szgyarto, C.A.-K., Odeberg, J., Djureinovic, D., Takanen, J.O., Hober, S., Alm, T., Edqvist, P.-H., Berling, H., Tegel, H., Mulder, J., Rockberg, J., Nilsson, P., Schwenk, J.M., Hamsten, M., von Feilitzen, K., Forsberg, M., Persson, L., Johansson, F., Zwahlen, M., von Heijne, G., Nielsen, J., and Pontén, F. (2015). Tissue-based map of the human proteome. *Science* 347.
- Vizcaino, J.A., Csordas, A., del-Toro, N., Dianes, J.A., Griss, J., Lavidas, I., Mayer, G., Perez-Riverol, Y., Reisinger, F., Ternent, T., Xu, Q.-W., Wang, R., and Hermjakob, H. (2016). 2016 update of the PRIDE database and its related tools. *Nucleic Acids Res* 44, D447-D456.
- Yue, F., Cheng, Y., Breschi, A., Vierstra, J., Wu, W., Ryba, T., Sandstrom, R., Ma, Z., Davis, C., Pope, B.D., Shen, Y., Pervouchine, D.D., Djebali, S., Thurman, R.E., Kaul, R., Rynes, E., Kirilusha, A., Marinov, G.K., Williams, B.A., Trout, D., Amrhein, H., Fisher-Aylor, K., Antoshechkin, I., DeSalvo, G., See, L.-H., Fastuca, M., Drenkow, J., Zaleski, C., Dobin, A., Prieto, P., Lagarde, J., Bussotti, G., Tanzer, A., Denas, O., Li, K., Bender, M.A., Zhang, M.,

Byron, R., Groudine, M.T., McCleary, D., Pham, L., Ye, Z., Kuan, S., Edsall, L., Wu, Y.-C., Rasmussen, M.D., Bansal, M.S., Kellis, M., Keller, C.A., Morrissey, C.S., Mishra, T., Jain, D., Dogan, N., Harris, R.S., Cayting, P., Kawli, T., Boyle, A.P., Euskirchen, G., Kundaje, A., Lin, S., Lin, Y., Jansen, C., Malladi, V.S., Cline, M.S., Erickson, D.T., Kirkup, V.M., Learned, K., Sloan, C.A., Rosenbloom, K.R., Lacerda de Sousa, B., Beal, K., Pignatelli, M., Flicek, P., Lian, J., Kahveci, T., Lee, D., James Kent, W., Ramalho Santos, M., Herrero, J., Notredame, C., Johnson, A., Vong, S., Lee, K., Bates, D., Neri, F., Diegel, M., Canfield, T., Sabo, P.J., Wilken, M.S., Reh, T.A., Giste, E., Shafer, A., Kutuyavin, T., Haugen, E., Dunn, D., Reynolds, A.P., Neph, S., Humbert, R., Scott Hansen, R., De Bruijn, M., Selleri, L., Rudensky, A., Josefowicz, S., Samstein, R., Eichler, E.E., Orkin, S.H., Levasseur, D., Papayannopoulou, T., Chang, K.-H., Skoultschi, A., Gosh, S., Disteché, C., Treuting, P., Wang, Y., Weiss, M.J., Blobel, G.A., Cao, X., Zhong, S., Wang, T., Good, P.J., Lowdon, R.F., Adams, L.B., Zhou, X.-Q., Pazin, M.J., Feingold, E.A., Wold, B., Taylor, J., Mortazavi, A., Weissman, S.M., Stamatoyannopoulos, J.A., Snyder, M.P., Guigo, R., Gingeras, T.R., Gilbert, D.M., Hardison, R.C., Beer, M.A., Ren, B., and The Mouse, E.C. (2014). A comparative encyclopedia of DNA elements in the mouse genome. *Nature* 515, 355-364.
